# Supplementary material for: Exome sequencing of gastric adenocarcinoma identifies recurrent somatic mutations in cell adhesion and chromatin remodeling genes
Source: Springer Nature journal article supplement (doi:10.1038/ng.2246), 2012-04-08
Supplement: 41588_2012_BFng2246_MOESM22_ESM.pdf [file 41588_2012_BFng2246_MOESM22_ESM.pdf]

## Supplementary Information

**Supplementary Figures 1-10**

**Supplementary Tables 1-16**

**Supplementary Notes**

### **Exome Sequencing of Gastric Adenocarcinoma Identifies Recurrent Somatic Mutations in Cell Adhesion and Chromatin Remodeling Genes**

Zhi Jiang Zang<sup>1,2,20</sup>, Ioana Cutcutache<sup>3,20</sup>, Song Ling Poon<sup>4</sup>, Shen Li Zhang<sup>2</sup>, John R McPherson<sup>3</sup>, Jiong Tao<sup>2,5</sup>, Vikneswari Rajasegaran<sup>4</sup>, Hong Lee Heng<sup>4</sup>, Niantao Deng<sup>2,6</sup>, Anna Gan<sup>4</sup>, Kiat Hon Lim<sup>7</sup>, Choon Kiat Ong<sup>4</sup>, DaChuan Huang<sup>4</sup>, Sze Yung Chin<sup>8</sup>, Iain Beehuat Tan<sup>6,9</sup>, Cedric Chuan Young Ng<sup>4</sup>, Willie Yu<sup>4,6</sup>, Yingting Wu<sup>10</sup>, Minghui Lee<sup>1</sup>, Jeanie Wu<sup>1</sup>, Dianne Poh<sup>2</sup>, Wei Keat Wan<sup>7</sup>, Sun Young Rha<sup>11</sup>, Jimmy So<sup>12</sup>, Manuel Salto-Tellez<sup>8,13</sup>, Khay Guan Yeoh<sup>14</sup>, Wai Keong Wong<sup>15</sup>, Yi-Jun Zhu<sup>16</sup>, P Andrew Futreal<sup>17</sup>, Brendan Pang<sup>5,8</sup>, Yijun Ruan<sup>18</sup>, Axel M Hillmer<sup>18</sup>, Denis Bertrand<sup>18</sup>, Niranjan Nagarajan<sup>18</sup>, Steve Rozen<sup>3,#</sup>, Bin Tean Teh<sup>2,4,19,#</sup> & Patrick Tan<sup>2,5,18,#</sup>

<sup>1</sup>Cellular and Molecular Research, National Cancer Centre, Singapore.

<sup>2</sup>Cancer and Stem Cell Biology Program, Duke-National University of Singapore (NUS) Graduate Medical School, Singapore.

<sup>3</sup>Neuroscience and Behavioral Disorders, Duke-NUS Graduate Medical School, Singapore.

<sup>4</sup>National Cancer Centre Singapore-Van Andel Research Institute Translational Research Laboratory, National Cancer Centre, Singapore.

<sup>5</sup>Cancer Sciences Institute of Singapore, Singapore.

<sup>6</sup>Graduate School for Integrative Sciences and Engineering; National University of Singapore, Singapore.

<sup>7</sup>Department of Pathology, Singapore General Hospital, Singapore.

<sup>8</sup>Department of Pathology, National University of Singapore, Singapore.

<sup>9</sup>Division of Medical Oncology, National Cancer Centre, Singapore.

<sup>10</sup>Computation and Systems Biology, Singapore-MIT Alliance, Singapore.

<sup>11</sup>Department of Internal Medicine, Yonsei Cancer Centre, Yonsei University College of Medicine, Seoul, South Korea.

<sup>12</sup>Department of Surgery, Yong Loo Lin School of Medicine (NUS), Singapore.

<sup>13</sup>Centre for Cancer Research and Cell Biology, Queen's University Belfast, UK

<sup>14</sup>Department of Medicine, Yong Loo Lin School of Medicine (NUS), Singapore.

<sup>15</sup>Department of General Surgery, Singapore General Hospital, Singapore.

<sup>16</sup>Department of Pathology, Northwestern University, Feinberg School of Medicine, Chicago, USA.

<sup>17</sup>Cancer Genome Project, Wellcome Trust Sanger Institute, Hinxton, UK.

<sup>18</sup>Genome Institute of Singapore, Singapore

<sup>19</sup>Laboratory of Cancer Genetics, Van Andel Research Institute, Grand Rapids, Michigan, USA.

<sup>20</sup>These authors contributed equally to this work.

#Address Correspondence to Patrick Tan ([gmstanp@duke-nus.edu.sg](mailto:gmstanp@duke-nus.edu.sg)), Bin Tean Teh ([teh.bin.tean@singhealth.com.sg](mailto:teh.bin.tean@singhealth.com.sg)), or Steve Rozen ([steve.rozen@duke-nus.edu.sg](mailto:steve.rozen@duke-nus.edu.sg))

## Supplementary Figures

### Supplementary Figure 1

**Mutation spectra of 15 gastric adenocarcinomas.** Mutation categories include their reverse complements – i.e. CpG → TpG also includes CpG → CpA, TpC→Tp\* (mutation of C to any other base in the context of TpC) also includes GpA → \*pA, C:G → T:A includes both C→T and G→A, and so forth. Counts include all in-target silent and non-silent somatic mutations passing quality filters, totaled over the 15 tumors.

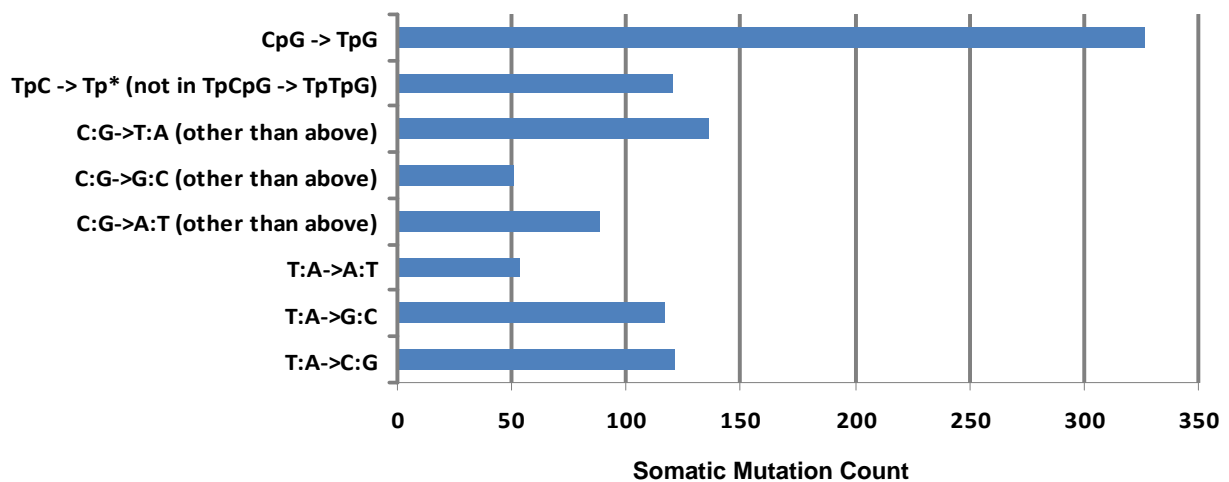

## Supplementary Figure 2

**Mutation spectra of gastric cancer and lung cancers.** Mutations belonging to the different mutation categories are presented. Gastric cancers exhibit a significantly different mutational spectra compared to tobacco-associated lung cancers ( $p < 10^{-16}$ , chi-square test, see **Online Methods**).

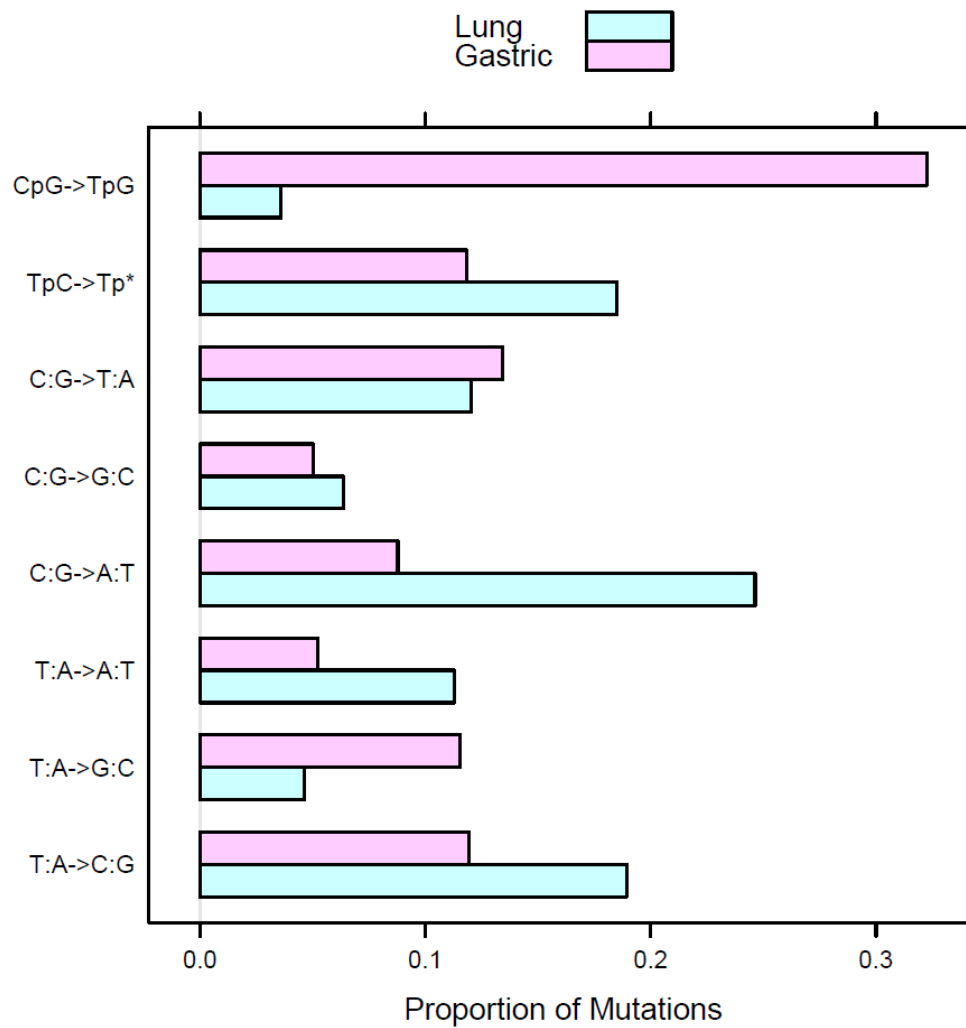

### Supplementary Figure 3

**Mutation spectra in *H. pylori* (HP)-negative and positive tumors.** HP-negative tumors are shown at the top and HP-positive tumors at the bottom. Mutation categories are shown in the color legend. Considerable heterogeneity is observed across the individual tumors.

CpG->TpG  
 TpC->Tp\*  
 C:G->T:A  
 C:G->G:C  
 C:G->A:T  
 T:A->A:T  
 T:A->G:C  
 T:A->C:G

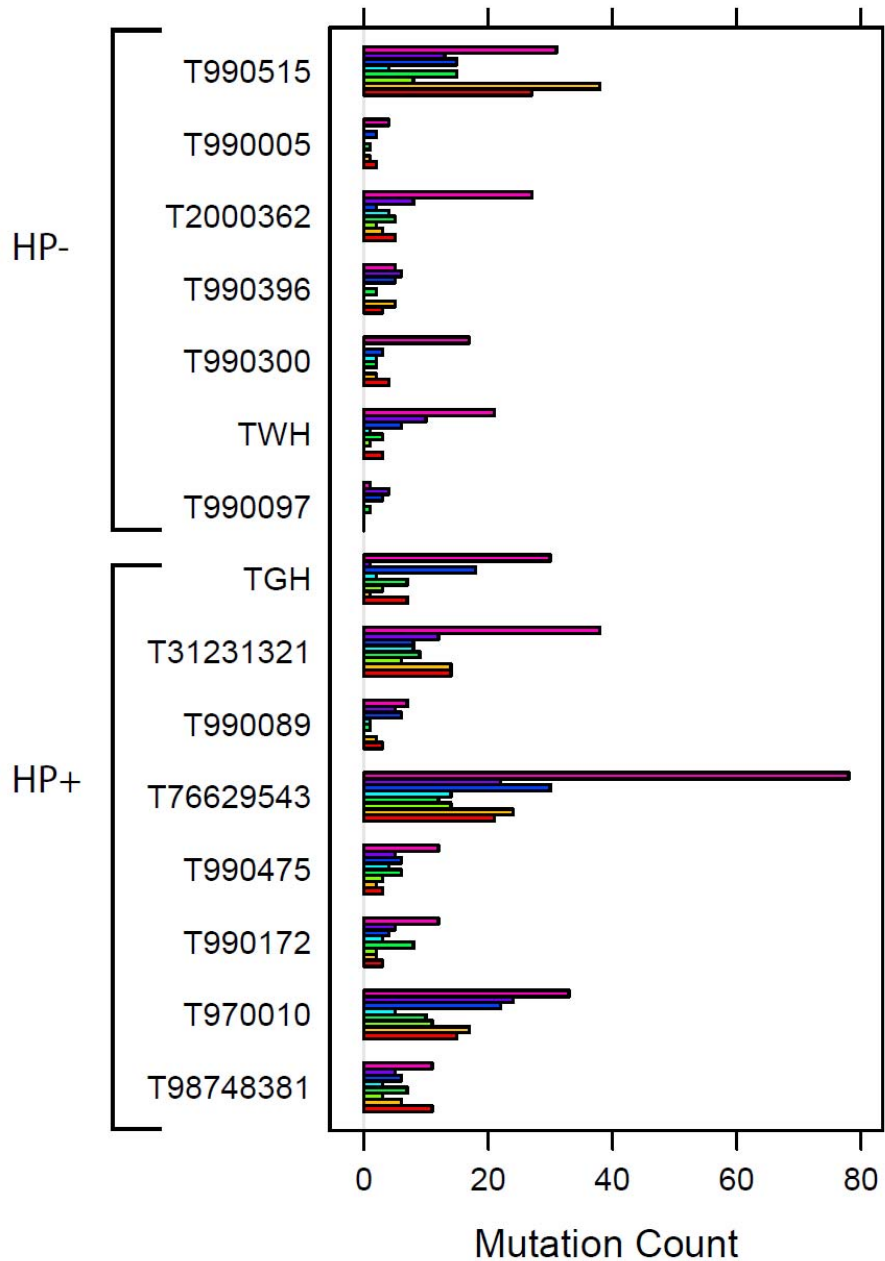



## Supplementary Figure 5

### Loss of heterozygosity at *FAT4* in tumors that also have missense somatic mutations in *FAT4*.

Panels A, B, and C refer to tumor 990515 and panels D, E, and F refer to 2000068. Both tumors have somatic mutations in *FAT4* (**Supplementary Table 11**) located in the middle of the long arm of chromosome 4. The analysis shows Affymetrix SNP Array 6.0 chip data from matched tumor and non-malignant DNA analyzed by ASCAT 2.0 (Allele-Specific Copy number Analysis of Tumors, Van Loo *et. al.*, 2010, see **Online Methods**).

A, D) (LogR, “logR ratio”) Each red dot shows, for a single SNP, the  $\log_2$  ratio of the total (i.e. both alleles combined) probe intensities in the tumor to the total probe intensities in the matched non-malignant sample. This estimates the ratio of total copy number in the tumor to total copy number in the non-malignant sample. The overlaid green dots show the segmentation (i.e. smoothing) of these data.

B, E) (BAF, “B allele frequency”) Each red dot shows the proportion of non-reference alleles in the tumor sample at sites that are heterozygous in the matched non-malignant sample. As for panels A and B, the green dots show the segmentation of these data. Regions where the green dots are simultaneously displaced to values higher and lower than 0.5 are regions of LOH or allelic imbalance. In both 990515 and 2000068 the green dots are widely separated across all of chromosome 4, indicating LOH.

C, F) ASCAT estimates of the genomic copy number of the two parental copies of each chromosome (arbitrarily colored red and green). The genomic copy number is shown along the y axis. Note that in both 990515 and 2000068, ASCAT estimates that one copy of chromosome 4 (the “green” copy) is completely deleted (copy number 0), leading to LOH.

Supplementary Figure 5 (Legend on preceding page)

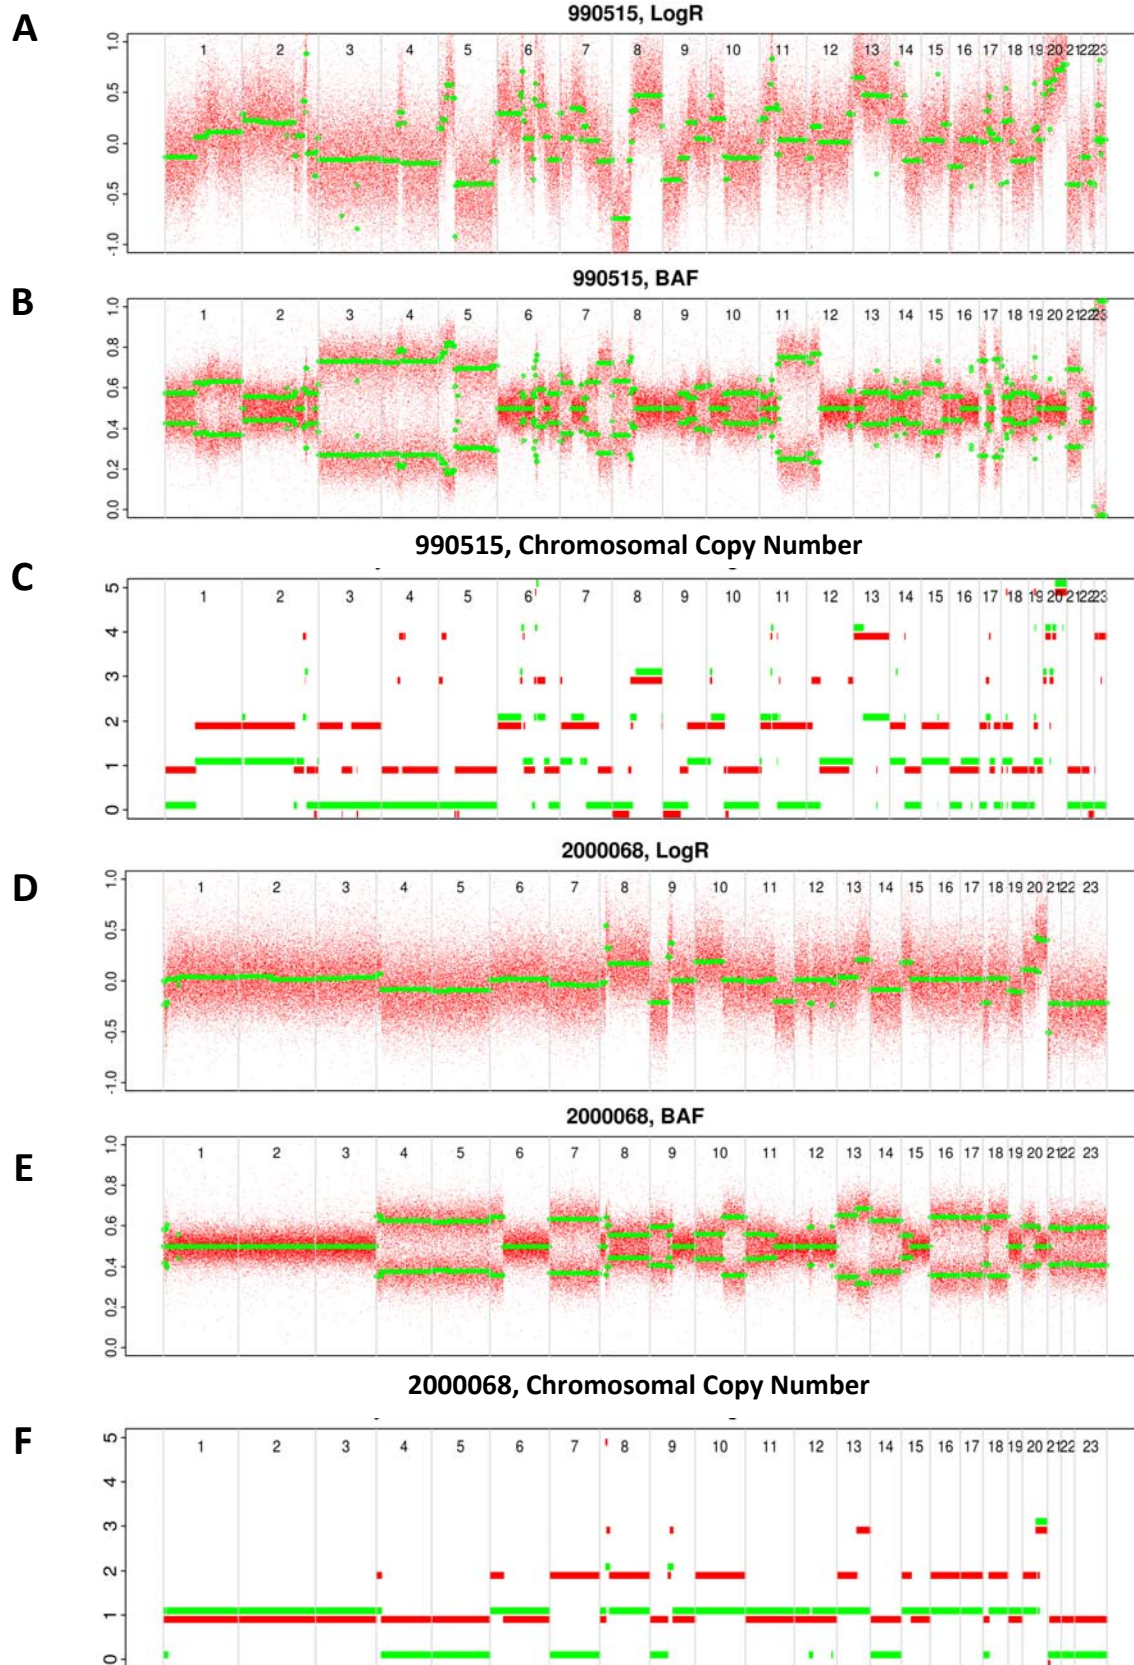

## Supplementary Figure 6

**FAT4 silencing using individual FAT4 siRNAs.** Four independent and non-overlapping *FAT4* siRNAs (Si-FAT4\_1, Si-FAT4\_2, Si-FAT4\_3, Si-FAT4\_4) were used to silence *FAT4* in three gastric cancer cell lines with wild-type *FAT4* gene (YCC16, HGC27, Hs746T). Western blotting was performed on samples after 48 hours of siRNA treatment. All experiments were performed a minimum of three independent times, and compared against a scrambled siRNA control (Si-Ctrl). Results are presented as mean  $\pm$  standard error of the mean (SEM). \* $p < 0.05$  compared with respective controls (Bonferroni post test). (A) YCC16, (B) HGC27, (C) Hs746T. *FAT4* silencing was observed to enhance cell proliferation in *FAT4* wild-type lines.

### A) YCC16

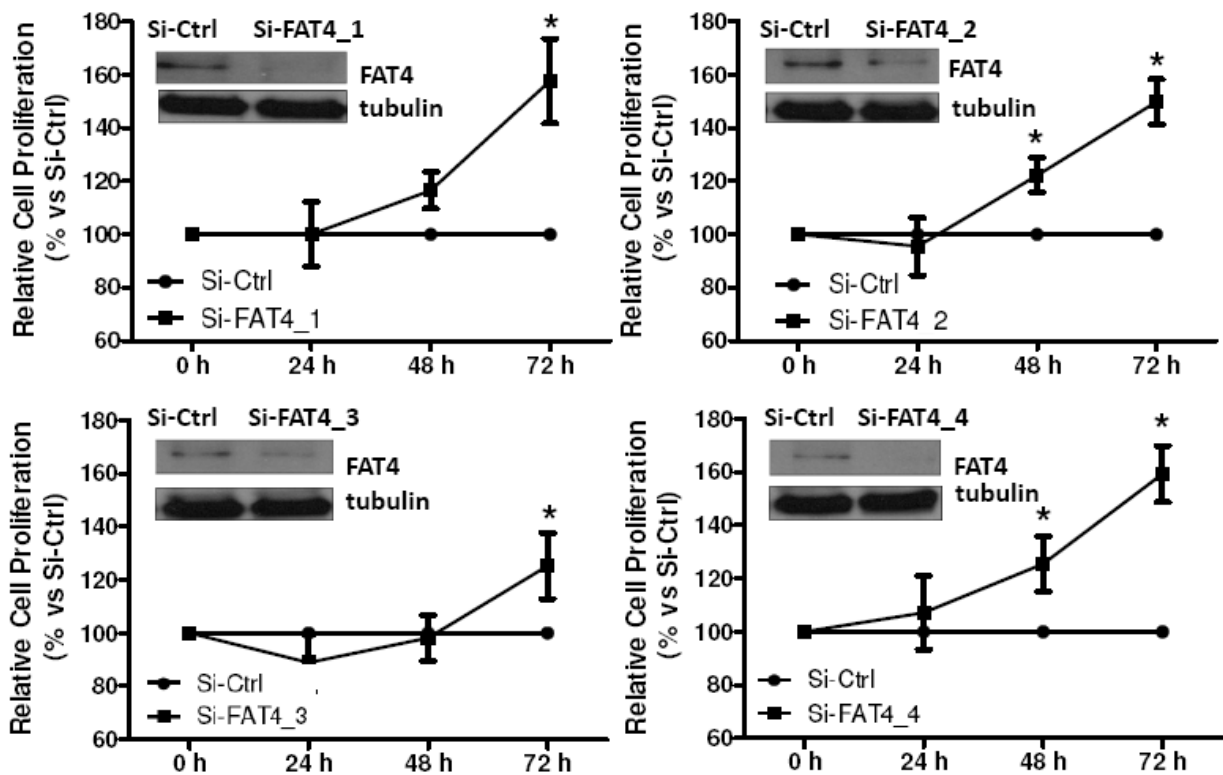



## B) HGC27

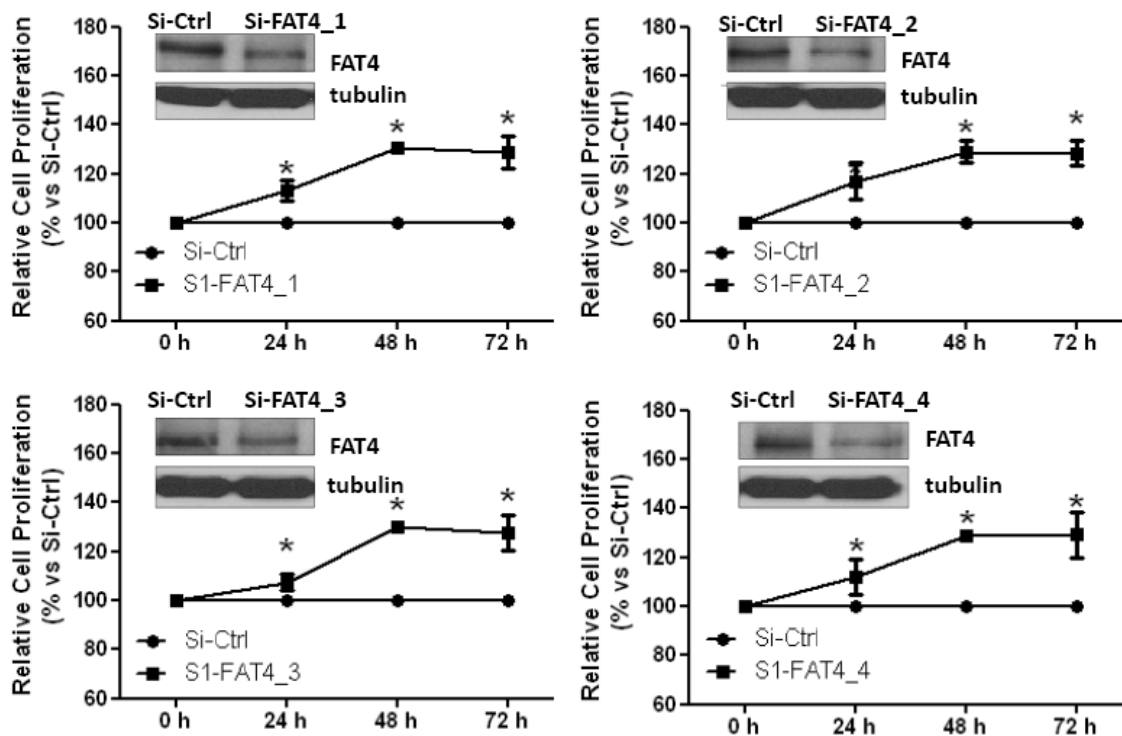

## C) HS746T

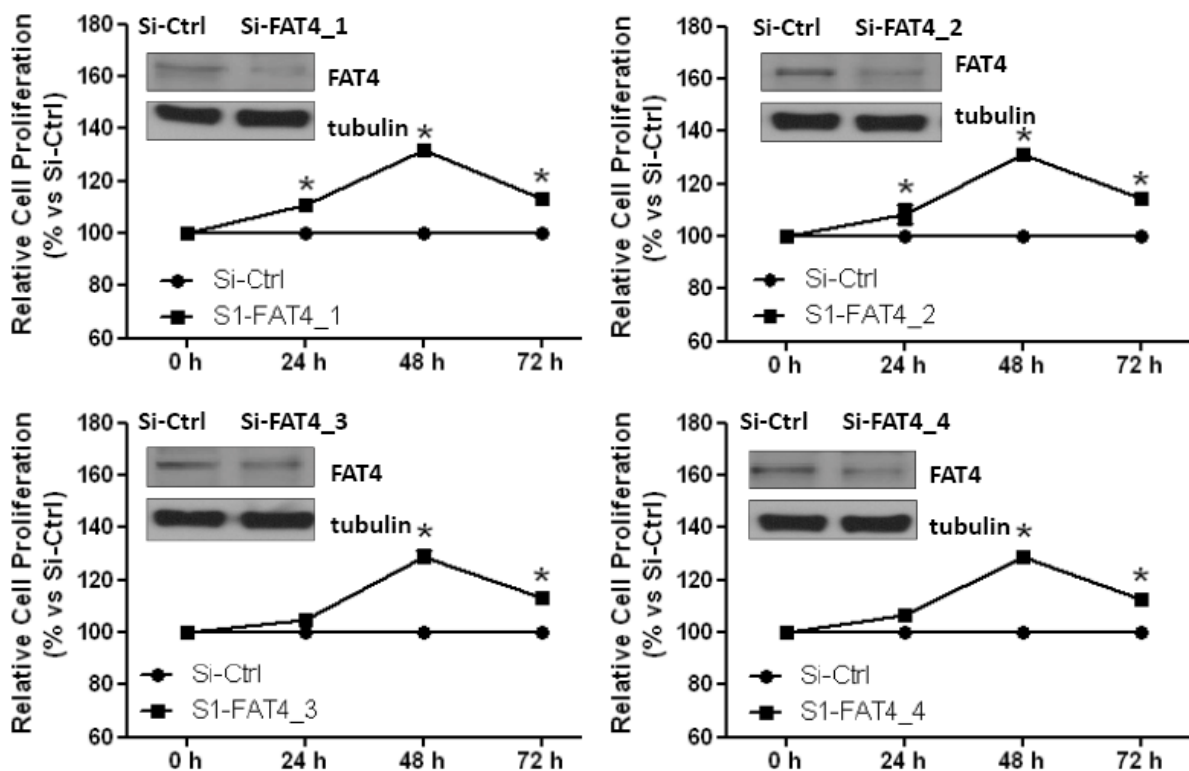

## Supplementary Figure 7

**FAT4 siRNA silencing in FAT4-mutated gastric cancer cells.** *FAT4* siRNAs were used to silence *FAT4* in MKN74 cells harboring a novel *FAT4* genetic alteration predicted to be "damaging" by Polyphen software. Pooled *FAT4* siRNAs were used in A), and multiple (n=4) individual siRNAs were used in B). Western blotting was performed on samples after 48 hrs of siRNA treatment. All experiments were performed a minimum of three independent times. \* $p < 0.05$  compared with respective controls (Student's t-test). *FAT4* silencing in MKN74 did not alter cell proliferation significantly.

### A) MKN74 (*FAT4* mutated, D4101Y)

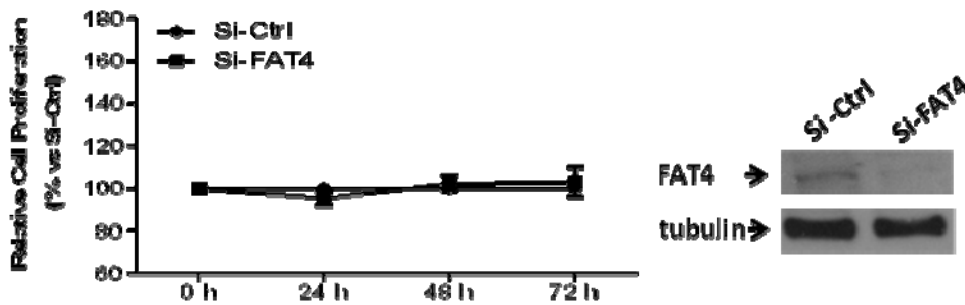

### B) MKN74 (Individual *FAT4* siRNAs)

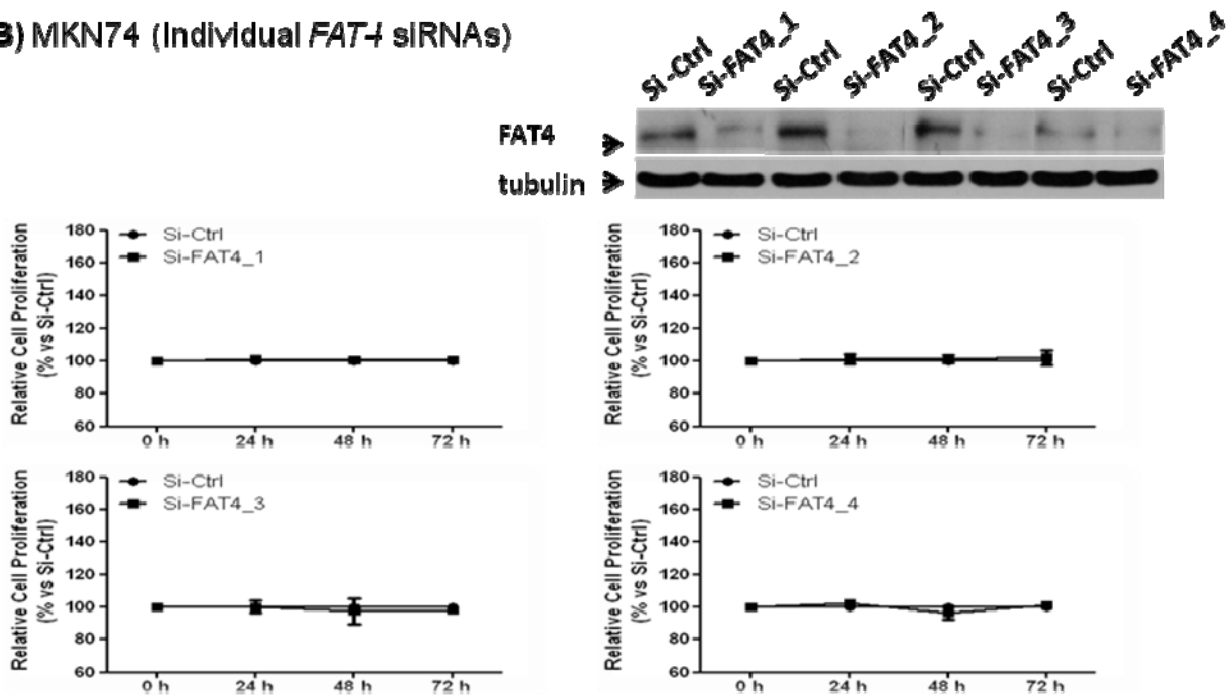

## Supplementary Figure 8

**ARID1A protein expression in *ARID1A* mutated and wild-type gastric cancers.** (Left) Positive ARID1A expression in a *ARID1A*-wild-type gastric cancer (Tumor 990515). Strong nuclear immunoreactivity is observed in cancer cells (arrow). (Right) Loss of ARID1A expression in a *ARID1A*-mutated gastric cancer (Tumor 980097). Nuclear ARID1A immunoreactivity is not observed in gastric cancer cells (arrow). However, ARID1A expression is still observed in lymphocytes, providing a positive control for the ARID1A immunohistochemistry staining protocol. Sections are shown at 200× magnification.

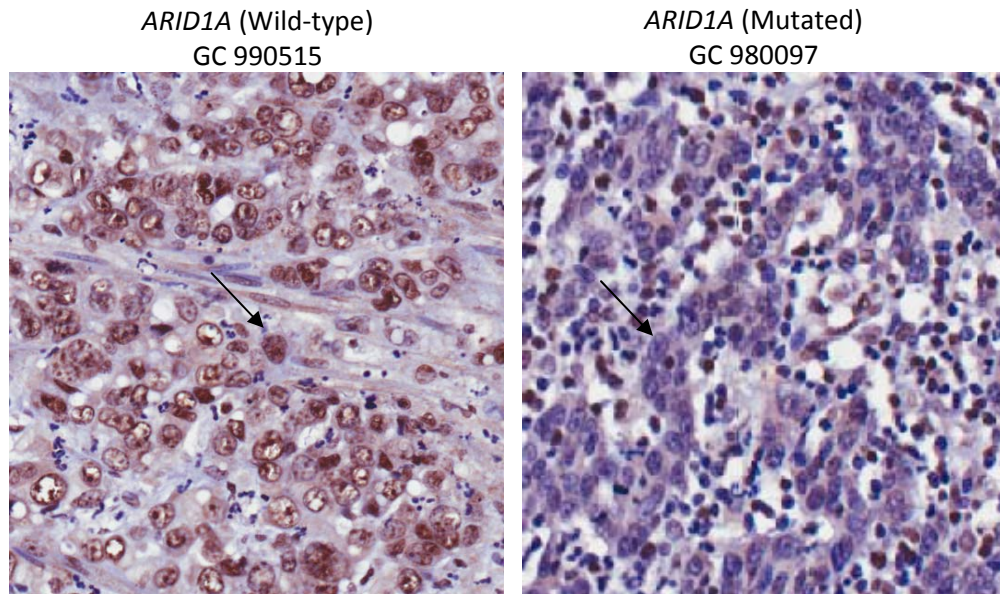

### Supplementary Figure 9

***ARID1A* shRNA-mediated silencing in YCC6 cells.** YCC6 cells exhibit genomic deletion of *ARID1A* and do not express ARID1A protein (see Figure 3b in Main Text). Treating YCC6 cells with *ARID1A* shRNAs does not elicit significant effects on cell proliferation.

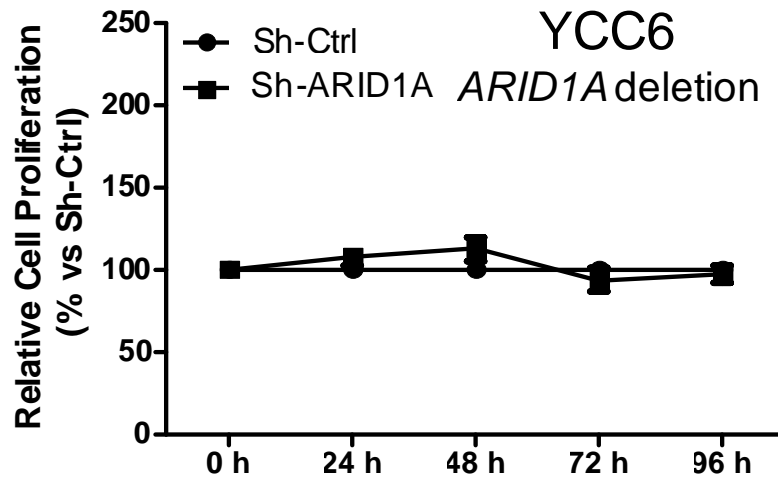

## Supplementary Figure 10

**ARID1A silencing using individual ARID1A siRNAs.** Three independent non-overlapping *ARID1A* siRNAs (Si-ARID1A\_1, Si-ARID1A\_2, Si-ARID1A\_3) were used to silence *ARID1A* in three gastric cancer cell lines with wild-type *ARID1A* genes. Western blotting was used to measure ARID1A protein in *ARID1A*-siRNA treated or scrambled-siRNA treated (Si-Ctrl) cells. Results are expressed as mean  $\pm$  standard error of the mean (SEM) of at least three independent experiments. \* $p < 0.05$  (Bonferroni post test) compared with respective controls (i.e. Si-Ctrl). *ARID1A* silencing was observed to enhance cell proliferation in *ARID1A* wild-type line (A) AZ521, (B) IST1, (C) SCH cells.

### A) AZ521

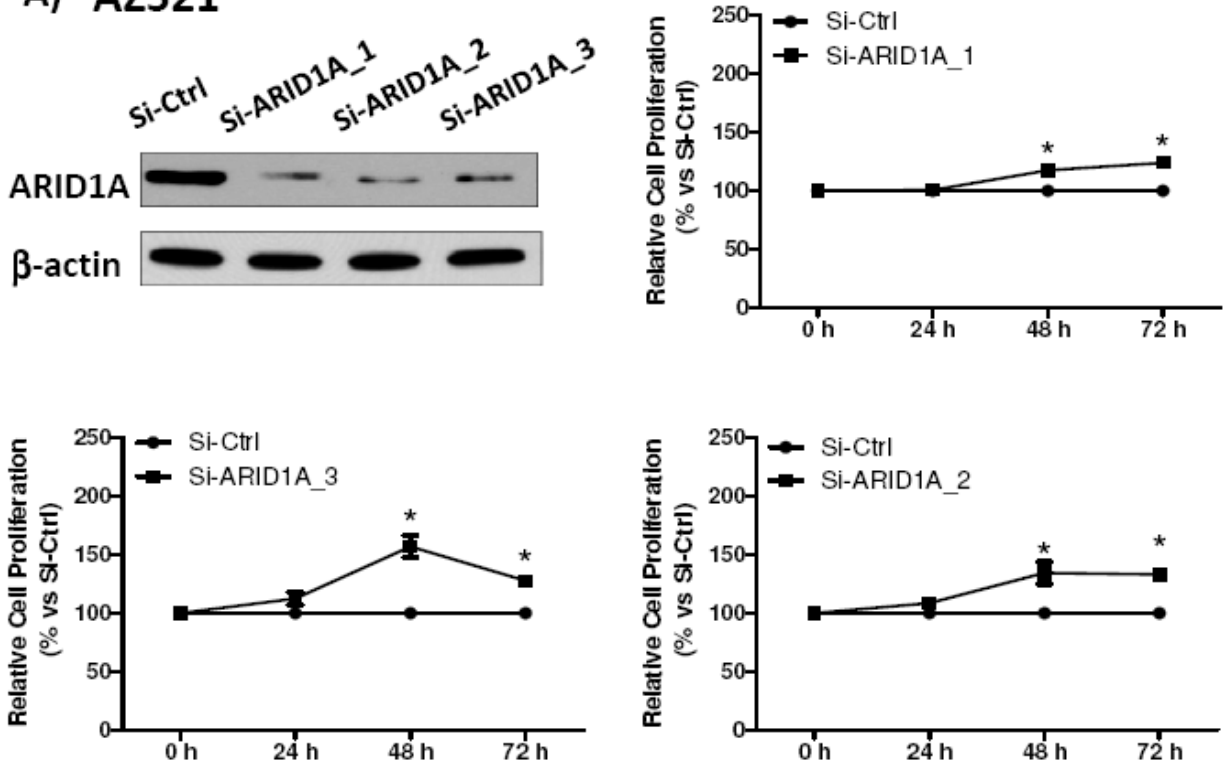

## B) IST

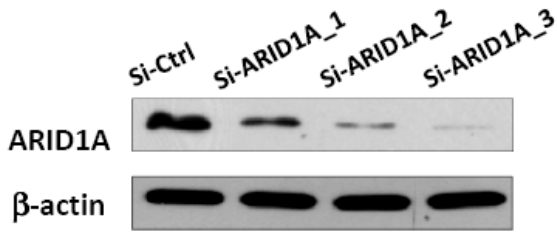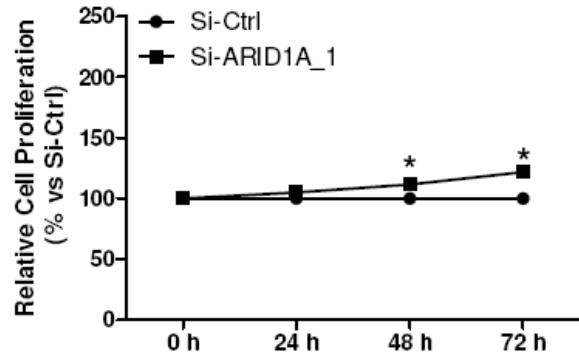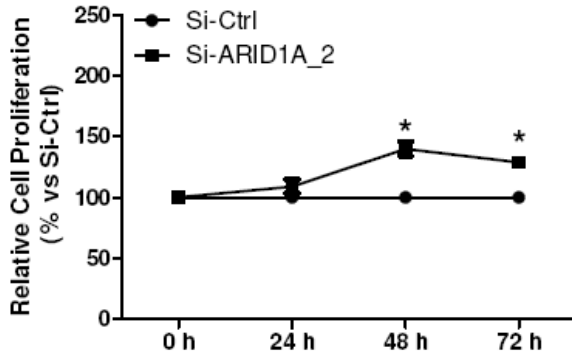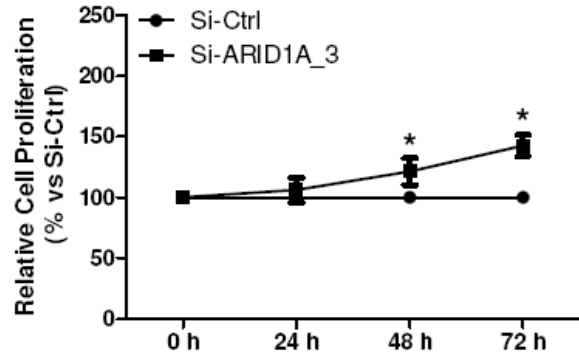

## C) SCH

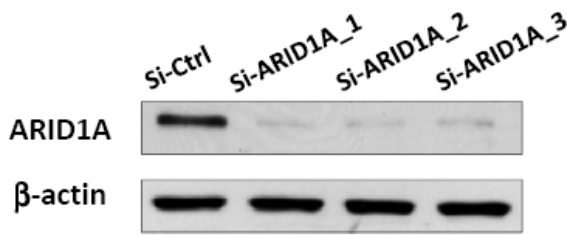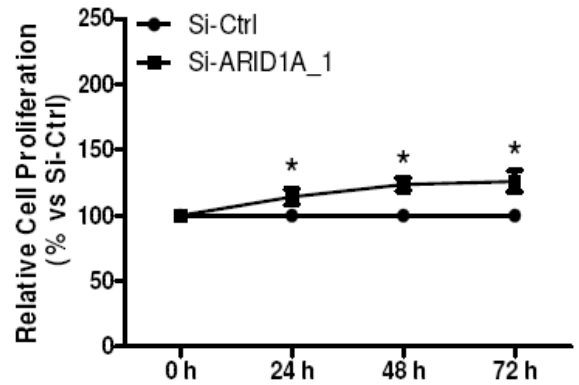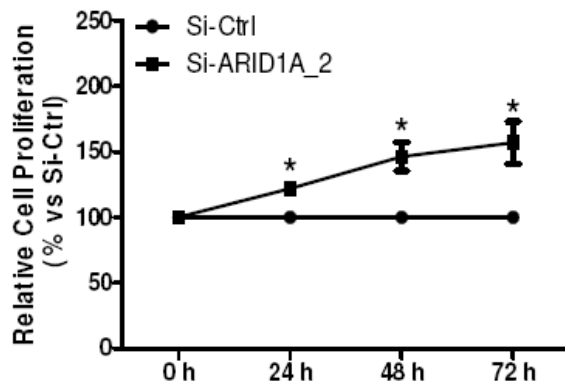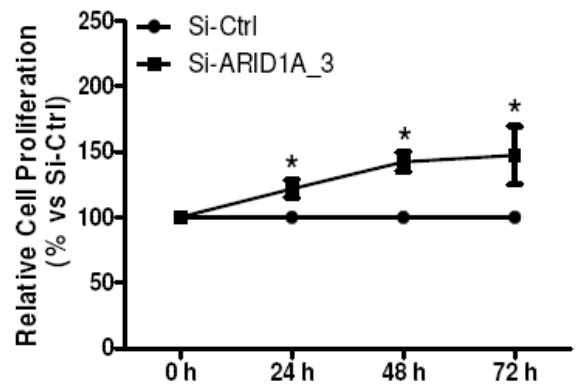

## Supplementary Tables

### Supplementary Table 1

#### Clinicopathologic features of the gastric adenocarcinomas used for exome sequencing

| ID       | Age (Y) | Ge | Site of Tumor | Stage (T) | Stage (N) | Stage (M) | Stage (AJC C6) | Grade                     | Lauren Classification | <i>H. pylori</i> Status | MSI status |
|----------|---------|----|---------------|-----------|-----------|-----------|----------------|---------------------------|-----------------------|-------------------------|------------|
| 990515   | 59      | m  | lesser curve  | T3        | N3        | m0        | 4              | moderately differentiated | intestinal            | no                      | MSS        |
| 990475   | 70      | m  | antrum        | T2a       | N1        | m0        | 2              | well differentiated       | intestinal            | yes                     | MSS        |
| 990396   | 64      | m  | greater curve | T3        | N2        | m0        | 3B             | poorly differentiated     | diffuse               | no                      | MSS        |
| 990300   | 50      | fe | body          | T3        | N2        | m0        | 3B             | poorly differentiated     | intestinal            | no                      | MSS        |
| 990172   | 60      | m  | lesser curve  | T2b       | N2        | m0        | 3A             | poorly differentiated     | intestinal            | yes                     | MSS        |
| 990097   | 46      | m  | cardia        | T3        | N2        | m0        | 3B             | poorly differentiated     | intestinal            | no                      | MSS        |
| 990089   | 56      | fe | incisura      | T3        | N2        | m1        | 4              | poorly differentiated     | intestinal            | yes                     | MSS        |
| 990005   | 60      | m  | greater curve | T3        | N2        | m0        | 3B             | poorly differentiated     | diffuse               | no                      | MSS        |
| 98748381 | 67      | m  | lesser curve  | T3        | N2        | m0        | 3B             | poorly differentiated     | mixed                 | yes                     | MSS        |
| 970010   | 72      | m  | unknown       | T3        | N1        | m0        | 3A             | moderately differentiated | intestinal            | yes                     | MSS        |
| 76629543 | 92      | m  | pylorus       | T3        | N1        | m0        | 3A             | moderately differentiated | intestinal            | yes                     | MSS        |
| 31231321 | 72      | m  | GE junction   | T3        | N3        | m0        | 4              | poorly differentiated     | diffuse               | yes                     | MSS        |
| 2000362  | 51      | m  | cardia        | T3        | N2        | m0        | 3B             | moderately differentiated | intestinal            | no                      | MSS        |
| TGH      | 77      | m  | unknown       | T3        | N2        | M0        | 3B             | moderately differentiated | intestinal            | yes                     | MSI        |
| TWH      | 77      | fe | unknown       | T2a       | N0        | M0        | 1B             | moderately-differentiated | intestinal            | No                      | MSS        |

## Supplementary Table 2

Summary of Illumina high throughput sequencing run analysis for 15 gastric adenocarcinoma exome pairs.

| Sample    | # of lanes  | # of targeted bases | Bases sequenced | Bases mapped to genome | Bases mapped to targeted regions | Avg # of reads per targeted base | Targeted bases with at least 10 reads (%) | Known SNPs in targeted regions |
|-----------|-------------|---------------------|-----------------|------------------------|----------------------------------|----------------------------------|-------------------------------------------|--------------------------------|
| N2000362  | 1           | 37806033            | 6969949783      | 5993546924             | 2962684844                       | 78.37                            | 91.91                                     | 22702                          |
| T2000362  | 1           | 37806033            | 5952677564      | 5061464528             | 2374774990                       | 62.81                            | 89.04                                     | 21813                          |
| N970010   | 2           | 37806033            | 7620174864      | 6594141332             | 3514610856                       | 92.96                            | 93.68                                     | 23075                          |
| T970010   | 2           | 37806033            | 7966946116      | 6908151304             | 3511126514                       | 92.87                            | 93.27                                     | 21490                          |
| N98748381 | 2           | 37806033            | 8154209036      | 6868014296             | 3675685420                       | 97.22                            | 94.45                                     | 23381                          |
| T98748381 | 2           | 37806033            | 7997067668      | 6711668946             | 3673771187                       | 97.17                            | 94.01                                     | 23208                          |
| N990515   | 1           | 37806033            | 7112388101      | 6179862886             | 3282176362                       | 86.82                            | 92.56                                     | 22822                          |
| T990515   | 1           | 37806033            | 4971281902      | 4077149010             | 2224905393                       | 58.85                            | 87.63                                     | 20624                          |
| N990172   | 2           | 37806033            | 8822829080      | 7361206906             | 4112900499                       | 108.79                           | 93.98                                     | 23046                          |
| T990172   | 2           | 37806033            | 8885987340      | 7617146858             | 4080063737                       | 107.92                           | 94.26                                     | 22895                          |
| N990475   | 2           | 37806033            | 9158287952      | 7654141012             | 4217295619                       | 111.55                           | 94.04                                     | 23065                          |
| T990475   | 2           | 37806033            | 8922401556      | 7324436158             | 3899950839                       | 103.16                           | 94.15                                     | 23094                          |
| N76629543 | 2           | 37806033            | 8543062016      | 6838063388             | 3308377286                       | 87.51                            | 89.67                                     | 21881                          |
| T76629543 | 2           | 37806033            | 9014876544      | 7743622404             | 3895184824                       | 103.03                           | 92.82                                     | 20730                          |
| N990089   | 1           | 37806033            | 4723502530      | 4183591592             | 1866604323                       | 49.37                            | 86.83                                     | 21676                          |
| T990089   | 1           | 37806033            | 5487972740      | 4872029114             | 2029863030                       | 53.69                            | 84.38                                     | 21088                          |
| N990300   | 2           | 37806033            | 9493701388      | 7091387218             | 3421655930                       | 90.51                            | 86.95                                     | 21238                          |
| T990300   | 2           | 37806033            | 8616916384      | 7395259782             | 3664436634                       | 96.93                            | 93.96                                     | 23309                          |
| N31231321 | 1           | 37806033            | 7645168089      | 6926398191             | 3142873586                       | 83.13                            | 89.02                                     | 21585                          |
| T31231321 | 1           | 37806033            | 7537716552      | 6672370765             | 2941004599                       | 77.79                            | 91.36                                     | 21883                          |
| N990396   | 1           | 37806033            | 8578223997      | 7740824778             | 3517519956                       | 93.04                            | 93.1                                      | 22624                          |
| T990396   | 1           | 37806033            | 9824092296      | 7559966096             | 3651699490                       | 96.59                            | 95.13                                     | 23144                          |
| N990097   | 1           | 37806033            | 1.9477E+10      | 1.5342E+10             | 7404084400                       | 195.84                           | 98.95                                     | 24398                          |
| T990097   | 1           | 37806033            | 2.0252E+10      | 1.592E+10              | 7774890897                       | 205.65                           | 99.07                                     | 24449                          |
| N990005   | 1           | 37806033            | 1.8763E+10      | 1.447E+10              | 7345214551                       | 194.29                           | 99.19                                     | 24300                          |
| T990005   | 1           | 37806033            | 2.116E+10       | 1.6899E+10             | 8250976521                       | 218.24                           | 99.11                                     | 24317                          |
| NGH       | from genome | 37806033            | 3709526850      | 3694298900             | 1754099669                       | 46.4                             | 98.44                                     | 23670                          |
| TGH       | from genome | 37806033            | 2103769475      | 2093644500             | 964167935                        | 25.5                             | 95.69                                     | 22621                          |
| NWH       | from genome | 37806033            | 2908010325      | 2898412800             | 1340077599                       | 35.45                            | 95.66                                     | 23085                          |
| TWH       | from genome | 37806033            | 2596614725      | 2587745475             | 1222284205                       | 32.33                            | 96.81                                     | 23241                          |



### **Supplementary Table 3**

**Non-synonymous somatic point mutations affecting exons or splice sites in 15 gastric adenocarcinomas.** Coordinates are based on Hg18.

The table is submitted separately as an Excel file

## Supplementary Table 4

**Somatic small insertions or deletions (indels) affecting exons in 15 gastric adenocarcinomas.**  
Coordinates are based on Hg18.

| Genes    | Confirmation by Sanger sequencing | Type     | ID       | Chr   | Start     | End       | Affects Exon Bases |
|----------|-----------------------------------|----------|----------|-------|-----------|-----------|--------------------|
| ACSBG2   | Yes                               | +A       | 990005   | chr19 | 6141638   | 6141638   | Yes                |
| APC      | Yes                               | -T       | 990172   | chr5  | 112205631 | 112205632 | Yes                |
| APC      | Yes                               | -TGA     | 990172   | chr5  | 112204790 | 112204793 | Yes                |
| ARID1A   | Yes                               | +A       | 990097   | chr1  | 26979722  | 26979722  | Yes                |
| C10orf68 | Yes                               | -AAAT    | 970010   | chr10 | 33057901  | 33057905  | Yes                |
| C6orf130 | Yes                               | -A       | TGH      | chr6  | 41145764  | 41145765  | Yes                |
| C7orf63  | Yes                               | -C       | 990396   | chr7  | 89755519  | 89755520  | Yes                |
| C9orf128 | Yes                               | -G       | TGH      | chr9  | 35816096  | 35816097  | Yes                |
| COIL     | Yes                               | -T       | TGH      | chr17 | 52383014  | 52383015  | Yes                |
| DSCAM    | Yes                               | -G       | TWH      | chr21 | 40307175  | 40307176  | Yes                |
| FBXO34   | Yes                               | +T       | TWH      | chr14 | 54888307  | 54888307  | Yes                |
| IL15RA   | Yes                               | -C       | 990097   | chr10 | 6042368   | 6042369   | Yes                |
| KCTD3    | Yes                               | -AA      | 990005   | chr1  | 213860519 | 213860521 | Yes                |
| NLGN4Y   | Yes                               | -A       | 990172   | chrY  | 15451621  | 15451622  | Yes                |
| NUP210   | Yes                               | -TG      | 76629543 | chr3  | 13338709  | 13338711  | Yes                |
| PPRC1    | Yes                               | +C       | 990097   | chr10 | 103891066 | 103891066 | Yes                |
| PTEN     | Yes                               | -A       | TGH      | chr10 | 89707749  | 89707750  | Yes                |
| PZP      | Yes                               | +G       | 98748381 | chr12 | 9246203   | 9246203   | Yes                |
| ROCK2    | Yes                               | -AT      | 990515   | chr2  | 11344163  | 11344165  | Yes                |
| RUNX1T1  | Yes                               | -CTTT    | 970010   | chr8  | 93057311  | 93057315  | Yes                |
| SHROOM3  | Yes                               | +C       | 98748381 | chr4  | 77879182  | 77879182  | Yes                |
| SLC9A11  | Yes                               | -T       | 990005   | chr1  | 171759835 | 171759836 | Yes                |
| SLITRK3  | Yes                               | -C       | 98748381 | chr3  | 166389349 | 166389350 | Yes                |
| TP53     | Yes                               | -G       | 990515   | chr17 | 7520075   | 7520076   | Yes                |
| TP53     | Yes                               | -G       | 76629543 | chr17 | 7520440   | 7520441   | Yes                |
| USP11    | Yes                               | +C       | TGH      | chrX  | 46992223  | 46992223  | Yes                |
| USP21    | Yes                               | -TCTGGCA | 98748381 | chr1  | 159399052 | 159399059 | Yes                |
| VPS13B   | Yes                               | -A       | 98748381 | chr8  | 100901372 | 100901373 | Yes                |
| ZNF202   | Yes                               | +T       | 31231321 | chr11 | 123104160 | 123104160 | Yes                |
| ZNF527   | Yes                               | -CA      | 76629543 | chr19 | 42571692  | 42571694  | Yes                |

## Supplementary Table 5

Numbers of non-silent (nonsense, missense, splice site somatic mutations, indels) and synonymous mutations detected in 15 gastric adenocarcinomas.

|                | Nonsense   | Splice     | Missense    | Sub-total   | Indel     | Total (Non-Silent) | Nonsyn <sup>a</sup> Somatic Mutations per Screened Mb | Syn Mutations | Syn Somatic Mutations per Screened Mb |
|----------------|------------|------------|-------------|-------------|-----------|--------------------|-------------------------------------------------------|---------------|---------------------------------------|
| 970010         | 3          | 3          | 84          | 90          | 2         | 92                 | 2.514                                                 | 39            | 1.127                                 |
| 990005         | 1          | 1          | 7           | 9           | 3         | 12                 | 0.217                                                 | 1             | 0.027                                 |
| 990089         | 3          | 1          | 16          | 20          | 0         | 20                 | 0.602                                                 | 6             | 0.19                                  |
| 990097         | 0          | 0          | 7           | 7           | 3         | 10                 | 0.191                                                 | 2             | 0.054                                 |
| 990172         | 1          | 2          | 26          | 29          | 3         | 32                 | 0.777                                                 | 6             | 0.173                                 |
| 990300         | 0          | 2          | 16          | 18          | 0         | 18                 | 0.497                                                 | 7             | 0.218                                 |
| 990396         | 2          | 1          | 15          | 18          | 1         | 19                 | 0.495                                                 | 6             | 0.175                                 |
| 990475         | 2          | 0          | 31          | 33          | 0         | 33                 | 0.949                                                 | 6             | 0.172                                 |
| 990515         | 3          | 8          | 103         | 114         | 2         | 116                | 3.124                                                 | 30            | 0.893                                 |
| 2000362        | 4          | 1          | 35          | 40          | 0         | 40                 | 1.16                                                  | 18            | 0.535                                 |
| 31231321       | 5          | 7          | 75          | 87          | 1         | 88                 | 2.442                                                 | 21            | 0.641                                 |
| 76629543       | 5          | 6          | 121         | 132         | 3         | 135                | 3.803                                                 | 64            | 1.932                                 |
| 98748381       | 3          | 7          | 31          | 41          | 5         | 46                 | 0.974                                                 | 9             | 0.258                                 |
| TGH            | 5          | 0          | 43          | 48          | 5         | 53                 | 1.331                                                 | 17            | 0.471                                 |
| TWH            | 1          | 0          | 31          | 32          | 2         | 34                 | 0.917                                                 | 9             | 0.258                                 |
| <b>Total</b>   | <b>38</b>  | <b>39</b>  | <b>641</b>  | <b>718</b>  | <b>30</b> | <b>748</b>         |                                                       | <b>241</b>    |                                       |
| <b>Average</b> | <b>2.5</b> | <b>2.6</b> | <b>42.7</b> | <b>47.8</b> | <b>2</b>  | <b>49.8</b>        | <b>1.333</b>                                          | <b>16.1</b>   | <b>0.475</b>                          |

<sup>a</sup> Nonsense plus missense

## Supplementary Table 6

### Recurrently mutated genes found from exome sequencing in 15 gastric adenocarcinomas.

| Genes    | # of samples bearing mut | # of somatic non-silent mut | # of somatic silent mut | Ratio of Non-syn/syn | Known function of the genes                                                                             | Previously Implicated in gastric cancer? (Pubmed ID is listed) |
|----------|--------------------------|-----------------------------|-------------------------|----------------------|---------------------------------------------------------------------------------------------------------|----------------------------------------------------------------|
| TP53     | 11                       | 11                          | 0                       | NA                   | Tumor suppressor gene                                                                                   | PMID:2032245                                                   |
| ARID1A   | 3                        | 3                           | 0                       | NA                   | SWI/SNF component, chromatin remodeling                                                                 | This study                                                     |
| PIK3CA   | 3                        | 3                           | 0                       | NA                   | Phosphatidylinositol 3-kinase, catalytic subunit                                                        | PMID:15784156; PMID:15994075                                   |
| PKHD1    | 3                        | 3                           | 0                       | NA                   | Receptor protein that might play a cytoskeleton and adhesion role                                       | This study                                                     |
| TTN      | 3                        | 5                           | 0                       | NA                   | Key component in the assembly and functioning of vertebrate striated muscles                            | This study                                                     |
| ABCC9    | 2                        | 2                           | 0                       | NA                   | ATP-sensitive potassium channel in vascular and non-vascular smooth muscle                              | This study                                                     |
| APOB     | 2                        | 2                           | 0                       | NA                   | Functions as a recognition signal for cellular binding and internalization                              | This study                                                     |
| ATP4A    | 2                        | 2                           | 0                       | NA                   | Gastric H <sup>+</sup> , K <sup>+</sup> -ATPase that maintains an acidic environment within the stomach | PMID:16048577; PMID:10764766                                   |
| BAI3     | 2                        | 2                           | 0                       | NA                   | G-protein coupled receptor                                                                              | This study                                                     |
| C1orf168 | 2                        | 2                           | 0                       | NA                   | Function is not known                                                                                   | This study                                                     |
| CCNL1    | 2                        | 2                           | 0                       | NA                   | Pre-mRNA splicing processes                                                                             | This study                                                     |
| CNTN1    | 2                        | 2                           | 0                       | NA                   | Cell adhesion molecule, a ligand of NOTCH1                                                              | This study                                                     |
| CSMD3    | 2                        | 4                           | 1                       | 4                    | Function is not known                                                                                   | This study                                                     |
| CTNNB1   | 2                        | 2                           | 0                       | NA                   | regulation of cell adhesion and Wnt signaling                                                           | PMID:21541555                                                  |
| DBR1     | 2                        | 3                           | 0                       | NA                   | RNA lariat debranching enzyme                                                                           | This study                                                     |
| DMD      | 2                        | 2                           | 2                       | 1                    | Anchors extracellular matrix to the cytoskeleton via F-actin                                            | This study                                                     |
| ERCC6    | 2                        | 2                           | 0                       | NA                   | Transcription-coupled nucleotide excision repair                                                        | This study                                                     |
| FAT4     | 2                        | 3                           | 0                       | NA                   | Cadherin family member. Involved in the non-canonical Wnt Signaling pathway                             | This study                                                     |
| FMN2     | 2                        | 2                           | 0                       | NA                   | Cytoskeletal organization and cell polarity                                                             | This study                                                     |
| HTR1E    | 2                        | 2                           | 0                       | NA                   | Receptor for 5-hydroxytryptamine                                                                        | This study                                                     |
| LRP1B    | 2                        | 4                           | 0                       | NA                   | Cell surface protein that internalizes ligands                                                          | PMID:20095042                                                  |
| MLL3     | 2                        | 2                           | 0                       | NA                   | Histone methyltransferase                                                                               | This study                                                     |
| OR4C15   | 2                        | 2                           | 1                       | 2                    | Odorant receptor                                                                                        | This study                                                     |
| OR4C46   | 2                        | 2                           | 0                       | NA                   | Odorant receptor                                                                                        | This study                                                     |
| RIT2     | 2                        | 3                           | 0                       | NA                   | Binds and exchanges GTP and GDP                                                                         | This study                                                     |
| SHROOM3  | 2                        | 2                           | 0                       | NA                   | Involved in regulating cell shape                                                                       | This study                                                     |
| SPTA1    | 2                        | 2                           | 1                       | 2                    | Cytoskeletal component of RBC plasma membrane                                                           | This study                                                     |
| ZSWIM3   | 2                        | 2                           | 0                       | NA                   | Function is not known                                                                                   | This study                                                     |
| ZZEF1    | 2                        | 2                           | 0                       | NA                   | Function is not known                                                                                   | This study                                                     |

### Supplementary Table 7

Ranking of genes by probability that they are affected by more somatic mutations than expected based on the background mutation rate. NS = non-synonymous single nucleotide substitutions. P=p value by Genome MuSiC's likelihood-ratio test (see **Online Methods**). FDR=false discovery rate. Genes in **Supplementary Table 6** are highlighted in orange. Genes in the GO “cell adhesion” category (GO: 0007155) are marked with \*.

| Rank | Gene            | Rank among<br>Recurrently Mutated<br>Genes (Sup. Table 6) | Rank among<br>Recurrently Mutated<br>Cell Adhesion genes | Mutation<br>Counts |        | P        | FDR    |
|------|-----------------|-----------------------------------------------------------|----------------------------------------------------------|--------------------|--------|----------|--------|
|      |                 |                                                           |                                                          | NS                 | Indels |          |        |
| 1    | <i>TP53</i>     | 1                                                         |                                                          | 9                  | 2      | 0.0000   | 0.0000 |
| 2    | <i>DBR1</i>     | 2                                                         |                                                          | 3                  | 0      | 2.40E-06 | 0.0198 |
| 3    | <i>RIT2</i>     | 3                                                         |                                                          | 2                  | 0      | 4.22E-06 | 0.0233 |
| 4    | <i>CCNL1</i>    | 4                                                         |                                                          | 2                  | 0      | 8.67E-06 | 0.0359 |
| 5    | <i>APC*</i>     |                                                           |                                                          | 0                  | 2      | 1.60E-05 | 0.0422 |
| 6    | <i>ATF5</i>     |                                                           |                                                          | 2                  | 0      | 1.64E-05 | 0.0422 |
| 7    | <i>PKHD1*</i>   | 5                                                         | 1                                                        | 3                  | 0      | 1.79E-05 | 0.0422 |
| 8    | <i>ADAM18</i>   |                                                           |                                                          | 2                  | 0      | 2.22E-05 | 0.0460 |
| 9    | <i>HTR1E</i>    | 6                                                         |                                                          | 2                  | 0      | 2.65E-05 | 0.0487 |
| 10   | <i>ARID1A</i>   | 7                                                         |                                                          | 2                  | 1      | 4.14E-05 | 0.0685 |
| 11   | <i>NFAT5</i>    |                                                           |                                                          | 2                  | 0      | 6.04E-05 | 0.0908 |
| 12   | <i>PPP1R1B</i>  |                                                           |                                                          | 1                  | 0      | 0.0001   | 0.1481 |
| 13   | <i>ZNF193</i>   |                                                           |                                                          | 1                  | 0      | 0.0001   | 0.1481 |
| 14   | <i>CERK</i>     |                                                           |                                                          | 2                  | 0      | 0.0001   | 0.1481 |
| 15   | <i>OR4C46</i>   | 8                                                         |                                                          | 2                  | 0      | 0.0001   | 0.1578 |
| 16   | <i>OR4C15</i>   | 9                                                         |                                                          | 2                  | 0      | 0.0002   | 0.1592 |
| 17   | <i>PIK3CA</i>   | 10                                                        |                                                          | 3                  | 0      | 0.0002   | 0.1604 |
| 35   | <i>APOB</i>     | 11                                                        |                                                          | 2                  | 0      | 0.0008   | 0.3225 |
| 37   | <i>SHROOM3</i>  | 12                                                        |                                                          | 1                  | 1      | 0.0009   | 0.3225 |
| 40   | <i>NLGN4Y*</i>  |                                                           |                                                          | 0                  | 1      | 0.0009   | 0.3225 |
| 42   | <i>LRP1B</i>    | 13                                                        |                                                          | 4                  | 0      | 0.0010   | 0.3225 |
| 47   | <i>ZSWIM3</i>   | 14                                                        |                                                          | 2                  | 0      | 0.0010   | 0.3225 |
| 51   | <i>C1orf168</i> | 15                                                        |                                                          | 2                  | 0      | 0.0012   | 0.3225 |
| 52   | <i>CTNNB1*</i>  | 16                                                        | 2                                                        | 2                  | 0      | 0.0012   | 0.3225 |
| 63   | <i>TNC*</i>     |                                                           |                                                          | 1                  | 0      | 0.0014   | 0.3225 |
| 67   | <i>CNTN1*</i>   | 17                                                        | 3                                                        | 2                  | 0      | 0.0015   | 0.3225 |
| 73   | <i>FAT4*</i>    | 18                                                        | 4                                                        | 3                  | 0      | 0.0016   | 0.3225 |
| 96   | <i>ERCC6</i>    | 19                                                        |                                                          | 2                  | 0      | 0.0021   | 0.3225 |
| 116  | <i>ATP4A</i>    | 20                                                        |                                                          | 2                  | 0      | 0.0026   | 0.3225 |
| 124  | <i>FMN2</i>     | 21                                                        |                                                          | 2                  | 0      | 0.0027   | 0.3225 |
| 127  | <i>BAI3</i>     | 22                                                        |                                                          | 2                  | 0      | 0.0028   | 0.3225 |
| 233  | <i>ABCC9</i>    | 23                                                        |                                                          | 2                  | 0      | 0.0048   | 0.3225 |
| 261  | <i>CSMD3</i>    | 24                                                        |                                                          | 3                  | 0      | 0.0052   | 0.3225 |
| 293  | <i>SPTA1</i>    | 25                                                        |                                                          | 2                  | 0      | 0.0058   | 0.3241 |
| 342  | <i>ZZEF1</i>    | 26                                                        |                                                          | 2                  | 0      | 0.0068   | 0.3269 |
| 467  | <i>DMD</i>      | 27                                                        |                                                          | 2                  | 0      | 0.0110   | 0.3888 |
| 528  | <i>TTN</i>      | 28                                                        |                                                          | 2                  | 0      | 0.0146   | 0.4566 |
| 671  | <i>MLL3</i>     | 29                                                        |                                                          | 1                  | 0      | 0.0558   | 1.0000 |
| ...  |                 |                                                           |                                                          |                    |        |          |        |

*~16,000 additional genes, most with no somatic mutations*

---

One *MLL3* variant in **Supplementary Table 6** is in a splice site and not analyzed here. For *TTN*, *CSMD3*, and *RIT2*, **Supplementary Table 6** includes variants that are not included in the analysis here, which only considers the longest transcript of each gene.

---

## Supplementary Table 8

**Summary of pathway analysis.** Biological terms associated with cell adhesion were found to be the most significantly enriched pathways, using DAVID Bioinformatics Resources 6.7 (<http://david.abcc.ncifcrf.gov/>). P-values were corrected for multiple hypothesis testing using the Benjamini method (second last column). Only annotation clusters passing a Benjamini-Hochberg p-value of <0.05 are listed.

| Category      | Term                           | Count | %    | P-Value  | Genes                                                                                                                                                                                                                                                                                                                                                                                                                                          | List Total | PoP Hits | Pop Total | Fold Enrichment | Bonfer-roni | Benja-mini | FDR      |
|---------------|--------------------------------|-------|------|----------|------------------------------------------------------------------------------------------------------------------------------------------------------------------------------------------------------------------------------------------------------------------------------------------------------------------------------------------------------------------------------------------------------------------------------------------------|------------|----------|-----------|-----------------|-------------|------------|----------|
| GOTERM_BP_FAT | GO:0007155~cell adhesion       | 58    | 8.46 | 1.77E-07 | POSTN, SDC3, CTNNB1, PCDHGA1, CDH20, COL12A1, ROBO2, COL11A1, DSCAM, RET, MAGI1, PTPRF, PCDH11Y, PCDHB2, LEF1, PTPRT, NRXN1, PCDH7, CTNNA2, SIGLEC1, CNTN1, ADAM17, RELN, DST, ROM1, DCHS2, ADAMTS13, PKHD1, TNC, COL3A1, DSCAML1, PCDHGC4, PCDHGC3, CDH4, PCDHAC2, LAMB4, CDH7, LGALS3BP, COL17A1, COL7A1, FAT4, COL27A1, COL6A3, PKD2, APC, LGALS4, NLGN1, NID1, ITGA4, COL5A3, PRPH2, PCDH18, DSG4, TSC1, NLGN4Y, DSG2, LAMA5, CD209, TROAP | 538        | 700      | 13528     | 2.08            | 4.47E-04    | 4.47E-04   | 3.12E-04 |
| GOTERM_BP_FAT | GO:0022610~biological adhesion | 58    | 8.46 | 1.81E-07 | POSTN, SDC3, CTNNB1, PCDHGA1, CDH20, COL12A1, ROBO2, COL11A1, DSCAM, RET, MAGI1, PTPRF, PCDH11Y, PCDHB2, LEF1, PTPRT, NRXN1, PCDH7, CTNNA2, SIGLEC1, CNTN1, ADAM17, RELN, DST, ROM1, DCHS2, ADAMTS13, PKHD1, TNC, COL3A1, DSCAML1, PCDHGC4, PCDHGC3, CDH4, PCDHAC2, LAMB4, CDH7, LGALS3BP, COL17A1, COL7A1, FAT4, COL27A1, COL6A3, PKD2, APC, LGALS4, NLGN1, NID1, ITGA4, COL5A3, PRPH2, PCDH18, DSG4, TSC1, NLGN4Y, DSG2, LAMA5, CD209, TROAP | 538        | 701      | 13528     | 2.08            | 4.59E-04    | 2.30E-04   | 3.21E-04 |
| GOTERM_BP_FAT | GO:0016337~cell-cell adhesion  | 27    | 3.94 | 4.07E-05 | DCHS2, PKHD1, DSCAML1, PCDHGC4, PCDHGC3, CDH4, PCDHAC2, PCDHGA1, CTNNB1, CDH7, CDH20, FAT4, ROBO2, COL11A1, RET, PTPRF, PCDH11Y, NLGN1, PCDHB2, PTPRT, ITGA4, PCDH7, PCDH18, CTNNA2, SIGLEC1, DSG4, DSG2, CD209                                                                                                                                                                                                                                | 538        | 276      | 13528     | 2.46            | 0.098       | 0.009      | 0.072    |

| Category      | Term                                                             | Count | %    | P-Value  | Genes                                                                                                                                                                                                                                            | List Total | Pop Hits | Pop Total | Fold Enrichment | Bonferroni | Benjamini | FDR   |
|---------------|------------------------------------------------------------------|-------|------|----------|--------------------------------------------------------------------------------------------------------------------------------------------------------------------------------------------------------------------------------------------------|------------|----------|-----------|-----------------|------------|-----------|-------|
| GOTERM_BP_FAT | GO:0000904~cell morphogenesis involved in differentiation        | 27    | 3.94 | 4.59E-06 | DCC, NDN, ERBB3, PKHD1, DSCAML1, CDH4, CTNNB1, MYCBP2, HOXA2, CXCR4, ROBO2, SEMA3A, DCLK1, DSCAM, APC, NTF3, LEF1, NRXN1, CTNNA2, SLITRK2, SLITRK3, LAMA5, NOTCH4, CYFIP1, RELN, DST, KALRN                                                      | 538        | 244      | 13528     | 2.78            | 0.012      | 0.003     | 0.008 |
| GOTERM_BP_FAT | GO:0031175~neuron projection development                         | 27    | 3.94 | 1.09E-05 | DCC, NDN, ERBB3, PKHD1, DSCAML1, CDH4, PTEN, MYCBP2, HOXA2, CXCR4, DMD, ROBO2, SEMA3A, DCLK1, DSCAM, APC, GNAO1, NTF3, NRXN1, CTNNA2, SLITRK2, SLITRK3, MAP2, CYFIP1, RELN, DST, KALRN                                                           | 538        | 256      | 13528     | 2.65            | 0.027      | 0.005     | 0.019 |
| GOTERM_BP_FAT | GO:0048812~neuron projection morphogenesis                       | 24    | 3.50 | 1.30E-05 | DCC, NDN, NTF3, ERBB3, PKHD1, DSCAML1, NRXN1, CDH4, MYCBP2, CTNNA2, SLITRK2, HOXA2, SLITRK3, CXCR4, DMD, CYFIP1, ROBO2, RELN, SEMA3A, DST, DCLK1, DSCAM, APC, KALRN                                                                              | 538        | 213      | 13528     | 2.83            | 0.032      | 0.005     | 0.023 |
| GOTERM_BP_FAT | GO:0000902~cell morphogenesis                                    | 33    | 4.81 | 1.40E-05 | DCC, SHROOM3, NDN, PKHD1, ERBB3, MAEL, DSCAML1, CDH4, MYCBP2, CTNNB1, HOXA2, ANK1, CXCR4, DMD, ROBO2, SEMA3A, DCLK1, IDUA, DSCAM, APC, NTF3, LEF1, NRXN1, CTNNA2, SLITRK2, SLITRK3, LAMA5, PRICKLE2, NOTCH4, CYFIP1, RELN, DST, KALRN            | 538        | 356      | 13528     | 2.33            | 0.035      | 0.005     | 0.025 |
| GOTERM_BP_FAT | GO:0032989~cellular component morphogenesis                      | 35    | 5.10 | 2.09E-05 | DCC, SHROOM3, NDN, PKHD1, ERBB3, MAEL, DSCAML1, TTN, CDH4, MYCBP2, CTNNB1, HOXA2, ANK1, CXCR4, DMD, ROBO2, SEMA3A, DCLK1, IDUA, DSCAM, APC, NTF3, LEF1, MYH6, NRXN1, CTNNA2, SLITRK2, SLITRK3, LAMA5, PRICKLE2, NOTCH4, CYFIP1, RELN, DST, KALRN | 538        | 397      | 13528     | 2.21            | 0.051      | 0.007     | 0.037 |
| GOTERM_BP_FAT | GO:0030030~cell projection organization                          | 33    | 4.81 | 2.73E-05 | DCC, DNAH9, NDN, PKHD1, ERBB3, DSCAML1, PTEN, CDH4, MYCBP2, HOXA2, CXCR4, DMD, ROBO2, SEMA3A, DCLK1, FGD4, DSCAM, APC, MYO1A, GNAO1, NTF3, NRXN1, VAV2, CTNNA2, SLITRK2, SLITRK3, TSC1, LAMA5, MAP2, CYFIP1, RELN, DST, KALRN                    | 538        | 368      | 13528     | 2.25            | 0.067      | 0.008     | 0.048 |
| GOTERM_BP_FAT | GO:0007409~axonogenesis                                          | 22    | 3.21 | 2.74E-05 | DCC, NDN, NTF3, ERBB3, PKHD1, DSCAML1, NRXN1, CDH4, MYCBP2, CTNNA2, SLITRK2, HOXA2, SLITRK3, CXCR4, CYFIP1, ROBO2, RELN, SEMA3A, DST, DCLK1, APC, KALRN                                                                                          | 538        | 193      | 13528     | 2.86            | 0.067      | 0.007     | 0.048 |
| GOTERM_BP_FAT | GO:0048667~cell morphogenesis involved in neuron differentiation | 23    | 3.35 | 2.97E-05 | DCC, NDN, NTF3, ERBB3, PKHD1, DSCAML1, NRXN1, CDH4, MYCBP2, CTNNA2, SLITRK2, HOXA2, SLITRK3, CXCR4, CYFIP1, ROBO2, RELN, SEMA3A, DST, DCLK1, DSCAM, APC, KALRN                                                                                   | 538        | 209      | 13528     | 2.76            | 0.073      | 0.007     | 0.053 |



| Category      | Term                                     | Count | %    | P-Value  | Genes                                                                                                                                                                                             | List Total | Pop Hits | Pop Total | Fold Enrichment | Bonferoni | Benjamini | FDR   |
|---------------|------------------------------------------|-------|------|----------|---------------------------------------------------------------------------------------------------------------------------------------------------------------------------------------------------|------------|----------|-----------|-----------------|-----------|-----------|-------|
| GOTERM_BP_FAT | GO:0048858~cell projection morphogenesis | 25    | 3.65 | 4.28E-05 | DCC, NDN, ERBB3, PKHD1, DSCAML1, CDH4, MYCBP2, HOXA2, CXCR4, DMD, ROBO2, SEMA3A, DCLK1, DSCAM, APC, NTF3, NRXN1, CTNNA2, SLITRK2, SLITRK3, LAMA5, CYFIP1, RELN, DST, KALRN                        | 538        | 245      | 13528     | 2.56            | 0.103     | 0.008     | 0.076 |
| GOTERM_BP_FAT | GO:0032990~cell part morphogenesis       | 25    | 3.65 | 8.55E-05 | DCC, NDN, ERBB3, PKHD1, DSCAML1, CDH4, MYCBP2, HOXA2, CXCR4, DMD, ROBO2, SEMA3A, DCLK1, DSCAM, APC, NTF3, NRXN1, CTNNA2, SLITRK2, SLITRK3, LAMA5, CYFIP1, RELN, DST, KALRN                        | 538        | 256      | 13528     | 2.45            | 0.195     | 0.015     | 0.151 |
| GOTERM_BP_FAT | GO:0048666~neuron development            | 29    | 4.23 | 2.06E-04 | DCC, NDN, ERBB3, PKHD1, DSCAML1, CDH4, PTEN, MYCBP2, HOXA2, CXCR4, DMD, ROBO2, SEMA3A, LHX8, DCLK1, DSCAM, APC, RET, GNAO1, NTF3, NRXN1, CTNNA2, SLITRK2, SLITRK3, MAP2, CYFIP1, RELN, DST, KALRN | 538        | 339      | 13528     | 2.15            | 0.407     | 0.032     | 0.364 |

## Supplementary Table 9

### Integrated table of clinicopathologic data of gastric cancers analyzed in this study.

| ID       | Age (Y) | Gen | Site of Tumor | Stage T | Stage N | Stage M | Stage (AJCC6) | Grade                     | Lauren Classification | <i>H. pylori</i> Status | <i>TP53</i> Mut | <i>PIK3CA</i> Mut | <i>FAT4</i> Mut | <i>ARID1A</i> Mut | MSI status | Sequencing |
|----------|---------|-----|---------------|---------|---------|---------|---------------|---------------------------|-----------------------|-------------------------|-----------------|-------------------|-----------------|-------------------|------------|------------|
| 990515   | 59      | M   | lesser curve  | T3      | N3      | m0      | 4             | moderately differentiated | intestinal            | no                      | c.336delC       | WT                | Q4872H, P4454L  | WT                | MSS        | Exome      |
| 990475   | 70      | M   | antrum        | T2a     | N1      | m0      | 2             | well differentiated       | intestinal            | yes                     | V272M           | WT                | WT              | WT                | MSS        | Exome      |
| 990396   | 64      | M   | greater curve | T3      | N2      | m0      | 3B            | poorly differentiated     | diffuse               | no                      | F134C           | WT                | WT              | WT                | MSS        | Exome      |
| 990300   | 50      | F   | body          | T3      | N2      | m0      | 3B            | poorly differentiated     | intestinal            | no                      | R248Q           | WT                | WT              | WT                | MSS        | Exome      |
| 990172   | 60      | M   | lesser curve  | T2b     | N2      | m0      | 3A            | poorly differentiated     | intestinal            | yes                     | V272L           | WT                | WT              | WT                | MSS        | Exome      |
| 990097   | 46      | M   | CARDIA        | T3      | N2      | m0      | 3B            | poorly differentiated     | intestinal            | no                      | WT              | E545K             | WT              | c.6748insA        | MSS        | Exome      |
| 990089   | 56      | F   | incisura      | T3      | N2      | m1      | 4             | poorly differentiated     | intestinal            | yes                     | R213*           | WT                | WT              | WT                | MSS        | Exome      |
| 990005   | 60      | M   | greater curve | T3      | N2      | m0      | 3B            | poorly differentiated     | diffuse               | no                      | WT              | WT                | WT              | R1276*            | MSS        | Exome      |
| 98748381 | 67      | M   | lesser curve  | T3      | N2      | m0      | 3B            | poorly differentiated     | mixed                 | yes                     | R248Q           | WT                | WT              | WT                | MSS        | Exome      |
| 970010   | 72      | M   | unknown       | T3      | N1      | m0      | 3A            | moderately differentiated | intestinal            | yes                     | R280S           | T1052K            | L1062R          | WT                | MSS        | Exome      |
| 76629543 | 92      | M   | PYLORUS       | T3      | N1      | m0      | 3A            | moderately differentiated | intestinal            | yes                     | c.80delC        | WT                | WT              | WT                | MSS        | Exome      |
| 31231321 | 72      | M   | GE junction   | T3      | N3      | m0      | 4             | poorly differentiated     | diffuse               | yes                     | R273C           | WT                | WT              | WT                | MSS        | Exome      |
| 2000362  | 51      | M   | CARDIA        | T3      | N2      | m0      | 3B            | moderately differentiated | intestinal            | no                      | WT              | WT                | WT              | WT                | MSS        | Exome      |
| TGH      | 77      | M   | unknown       | T3      | N2      | M0      | 3B            | moderately differentiated | intestinal            | yes                     | WT              | R93Q              | WT              | R1721*            | MSI        | Exome      |
| TWH      | 77      | F   | unknown       | T2a     | N0      | M0      | 1B            | moderately-differentiated | intestinal            | No                      | R273C           | WT                | WT              | WT                | MSS        | Exome      |
|          |         |     |               |         |         |         |               |                           |                       |                         |                 |                   |                 |                   |            |            |
| 990424   | 70      | M   | antrum        | T2b     | N1      | m0      | 2             | moderately differentiated | diffuse               | no                      | WT              | Unknown           | WT              | WT                | MSS        | Sanger     |
| 990413   | 67      | M   | greater curve | T2a     | N1      | m0      | 2             | poorly differentiated     | diffuse               | no                      | WT              | WT                | WT              | WT                | MSS        | Sanger     |
| 990412   | 64      | M   | greater curve | T3      | N1      | m0      | 3A            | poorly differentiated     | intestinal            | no                      | R196*           | Unknown           | WT              | WT                | MSS        | Sanger     |
| 990355   | 34      | F   | incisura      | T3      | N3      | m1      | 4             | poorly differentiated     | diffuse               | yes                     | WT              | WT                | WT              | WT                | MSS        | Sanger     |
| 990275   | 71      | M   | lesser curve  | T3      | N0      | m0      | 2             | moderately differentiated | intestinal            | no                      | Y163C           | Unknown           | WT              | WT                | MSS        | Sanger     |

| ID     | Age (Y) | Gen | Site of Tumor | Stage T | Stage N | Stage M | Stage (AJCC6) | Grade                     | Lauren Classification | H. pylori Status | TP53 Mut                         | PIK3CA Mut | FAT4 Mut | ARID1A Mut             | MSI status | Sequencing |
|--------|---------|-----|---------------|---------|---------|---------|---------------|---------------------------|-----------------------|------------------|----------------------------------|------------|----------|------------------------|------------|------------|
| 990228 | 40      | F   | lesser curve  | T3      | N1      | m0      | 3A            | poorly differentiated     | diffuse               | no               | WT                               | Unknown    | WT       | WT                     | MSS        | Sanger     |
| 990205 | 72      | F   | lesser curve  | T2b     | N1      | m0      | 2             | poorly differentiated     | intestinal            | no               | WT                               | Unknown    | WT       | c.400delG; c.3216delA  | MSI        | Sanger     |
| 990203 | 79      | M   | CARDIA        | T3      | N1      | m0      | 3A            | poorly differentiated     | intestinal            | no               | R248W                            | Unknown    | WT       | WT                     | MSS        | Sanger     |
| 990195 | 31      | M   | antrum        | T3      | N1      | m1      | 4             | moderately differentiated | intestinal            | no               | c.529_546 delCCCCACCAT GAGCGCTGC | Unknown    | WT       | WT                     | MSS        | Sanger     |
| 990170 | 41      | F   | body          | T3      | N1      | m0      | 3A            | poorly differentiated     | intestinal            | no               | WT                               | Unknown    | WT       | WT                     | MSS        | Sanger     |
| 990129 | 77      | F   | greater curve | T3      | N1      | m0      | 3A            | moderately differentiated | intestinal            | yes              | WT                               | Unknown    | WT       | WT                     | MSS        | Sanger     |
| 990119 | 57      | M   | greater curve | T3      | N1      | m0      | 3A            | poorly differentiated     | diffuse               | no               | WT                               | Unknown    | WT       | WT                     | MSS        | Sanger     |
| 990111 | 74      | F   | lesser curve  | T1      | N0      | m0      | 1A            | moderately differentiated | intestinal            | no               | WT                               | Unknown    | C4479F   | WT                     | MSI        | Sanger     |
| 990108 | 65      | M   | body          | T2b     | N1      | m0      | 2             | moderately differentiated | intestinal            | yes              | c.511del G                       | Unknown    | WT       | WT                     | MSS        | Sanger     |
| 990090 | 64      | M   | lesser curve  | T3      | N1      | m0      | 3A            | moderately differentiated | intestinal            | no               | S106R                            | Unknown    | WT       | WT                     | MSS        | Sanger     |
| 990073 | 59      | M   | greater curve | T3      | N2      | m0      | 3B            | moderately differentiated | intestinal            | yes              | WT                               | Unknown    | WT       | WT                     | MSS        | Sanger     |
| 990071 | 71      | F   | anastomosis   | T4      | N0      | m0      | 4             | moderately differentiated | intestinal            | no               | WT                               | WT         | WT       | WT                     | MSS        | Sanger     |
| 990070 | 43      | M   | lesser curve  | T3      | N3      | m0      | 4             | poorly differentiated     | diffuse               | yes              | WT                               | Unknown    | WT       | WT                     | MSS        | Sanger     |
| 990068 | 74      | M   | body          | T3      | N1      | m0      | 3A            | poorly differentiated     | diffuse               | no               | WT                               | Unknown    | WT       | WT                     | MSS        | Sanger     |
| 990060 | 26      | F   | body          | T3      | N1      | m0      | 3A            | poorly differentiated     | diffuse               | yes              | WT                               | Unknown    | WT       | WT                     | MSS        | Sanger     |
| 990046 | 56      | M   | antrum        | T3      | N2      | m0      | 3B            | poorly differentiated     | diffuse               | no               | WT                               | Unknown    | WT       | WT                     | MSS        | Sanger     |
| 990044 | 69      | M   | greater curve | T3      | N2      | m0      | 3B            | moderately differentiated | intestinal            | yes              | WT                               | WT         | WT       | WT                     | MSS        | Sanger     |
| 990041 | 41      | M   | GE junction   | T4      | N1      | m0      | 4             | poorly differentiated     | intestinal            | yes              | WT                               | WT         | WT       | WT                     | MSS        | Sanger     |
| 990024 | 68      | M   | lesser curve  | T3      | N1      | m0      | 3A            | moderately differentiated | intestinal            | yes              | WT                               | R88Q       | WT       | c.1650delC; c.3978InsC | MSI        | Sanger     |
| 990015 | 61      | M   | lesser curve  | T1      | N0      | m0      | 1A            | moderately differentiated | intestinal            | no               | WT                               | Unknown    | WT       | WT                     | MSS        | Sanger     |
| 990010 | 70      | M   | body          | T4      | N3      | m1      | 4             | poorly differentiated     | intestinal            | no               | H179R                            | WT         | WT       | WT                     | MSS        | Sanger     |
| 980447 | 68      | M   | lesser curve  | T3      | N3      | m0      | 4             | poorly differentiated     | intestinal            | no               | c.545_549del GCTCA               | Unknown    | WT       | WT                     | MSS        | Sanger     |
| 980442 | 61      | F   | unknown       | T2a     | N1      | m0      | 2             | poorly differentiated     | diffuse               | no               | WT                               | Unknown    | WT       | WT                     | MSS        | Sanger     |
| 980437 | 67      | F   | incisura      | T3      | N3      | m0      | 4             | poorly differentiated     | intestinal            | no               | c.250_262 delGCCCTGC ACCAG       | WT         | WT       | WT                     | MSS        | Sanger     |

| ID     | Age (Y) | Gen | Site of Tumor | Stage T | Stage N | Stage M | Stage (AJCC6) | Grade                     | Lauren Classification | <i>H. pylori</i> Status | <i>TP53</i> Mut | <i>PIK3CA</i> Mut | <i>FAT4</i> Mut | <i>ARID1A</i> Mut  | MSI status | Sequencing |
|--------|---------|-----|---------------|---------|---------|---------|---------------|---------------------------|-----------------------|-------------------------|-----------------|-------------------|-----------------|--------------------|------------|------------|
| 980436 | 64      | F   | lesser curve  | T3      | N1      | m0      | 3A            | moderately differentiated | intestinal            | no                      | WT              | E545K             | WT              | WT                 | MSS        | Sanger     |
| 980418 | 87      | M   | greater curve | T3      | N1      | m0      | 3A            | moderately differentiated | intestinal            | yes                     | WT              | Unknown           | WT              | WT                 | MSI        | Sanger     |
| 980401 | 83      | F   | unknown       | T3      | N1      | m0      | 3A            | poorly differentiated     | diffuse               | no                      | WT              | Unknown           | WT              | WT                 | MSS        | Sanger     |
| 980390 | 77      | F   | unknown       | T1      | N1      | m0      | 1B            | moderately differentiated | intestinal            | no                      | P219L;<br>Y220C | Unknown           | WT              | WT                 | MSS        | Sanger     |
| 980386 | 76      | F   | CARDIA        | T3      | N2      | m0      | 3B            | poorly differentiated     | diffuse               | yes                     | WT              | Unknown           | WT              | WT                 | MSS        | Sanger     |
| 980369 | 46      | F   | body          | T2a     | N0      | m0      | 1B            | poorly differentiated     | diffuse               | no                      | WT              | WT                | WT              | WT                 | MSS        | Sanger     |
| 980344 | 69      | F   | unknown       | T3      | N1      | m1      | 4             | poorly differentiated     | diffuse               | no                      | WT              | Unknown           | WT              | WT                 | MSS        | Sanger     |
| 980327 | 69      | F   | unknown       | T3      | N1      | m0      | 3A            | poorly differentiated     | mixed                 | no                      | WT              | Unknown           | WT              | WT                 | MSS        | Sanger     |
| 980319 | 67      | M   | unknown       | T3      | N1      | m0      | 3A            | poorly differentiated     | mixed                 | yes                     | WT              | WT                | WT              | WT                 | MSS        | Sanger     |
| 980305 | 39      | F   | unknown       | T3      | N3      | m0      | 4             | poorly differentiated     | diffuse               | no                      | WT              | Unknown           | WT              | WT                 | MSS        | Sanger     |
| 980252 | 66      | M   | body          | T3      | N1      | m1      | 4             | poorly differentiated     | intestinal            | yes                     | WT              | Unknown           | WT              | WT                 | MSS        | Sanger     |
| 980251 | 53      | F   | unknown       | T1      | N0      | m0      | 1A            | poorly differentiated     | diffuse               | yes                     | A74T            | Unknown           | WT              | WT                 | MSS        | Sanger     |
| 980211 | 63      | M   | unknown       | T3      | N2      | m0      | 3B            | moderately differentiated | intestinal            | yes                     | WT              | Unknown           | WT              | WT                 | MSS        | Sanger     |
| 980161 | 66      | F   | lesser curve  | T4      | N1      | m0      | 4             | moderately differentiated | intestinal            | no                      | WT              | E545K             | WT              | c.5547 insG        | MSS        | Sanger     |
| 980097 | 65      | M   | unknown       | T2a     | N1      | m0      | 2             | undifferentiated          | mixed                 | no                      | WT              | Unknown           | WT              | Q812*              | MSS        | Sanger     |
| 980095 | 49      | F   | CARDIA        | T4      | N3      | m0      | 4             | poorly differentiated     | diffuse               | no                      | WT              | WT                | WT              | WT                 | MSS        | Sanger     |
| 980048 | 46      | F   | unknown       | T3      | N0      | m1      | 4             | poorly differentiated     | diffuse               | yes                     | WT              | Unknown           | WT              | WT                 | MSS        | Sanger     |
| 980029 | 76      | M   | unknown       | T3      | N1      | m0      | 3A            | poorly differentiated     | diffuse               | no                      | Y220C           | WT                | WT              | WT                 | MSS        | Sanger     |
| 980028 | 61      | M   | unknown       | T2a     | N0      | m0      | 1B            | moderately differentiated | intestinal            | no                      | WT              | Unknown           | WT              | c.3999-4001 delGCA | MSI        | Sanger     |
| 980025 | 80      | M   | unknown       | T3      | N3      | m0      | 4             | poorly differentiated     | intestinal            | yes                     | WT              | Unknown           | WT              | WT                 | MSS        | Sanger     |
| 980021 | 59      | M   | unknown       | T3      | N1      | m0      | 3A            | moderately differentiated | intestinal            | no                      | Y234C           | Unknown           | WT              | WT                 | MSS        | Sanger     |
| 980011 | 74      | M   | unknown       | T4      | N1      | m0      | 4             | poorly differentiated     | intestinal            | no                      | WT              | E545K             | WT              | WT                 | MSS        | Sanger     |
| 970017 | 57      | F   | body          | T3      | N0      | m0      | 2             | poorly differentiated     | diffuse               | yes                     | WT              | WT                | WT              | WT                 | MSS        | Sanger     |
| 970005 | 68      | M   | GE junction   | T4      | N2      | m0      | 4             | moderately differentiated | intestinal            | no                      | c.445d eIT      | Unknown           | WT              | WT                 | MSS        | Sanger     |

| ID       | Age (Y) | Gen | Site of Tumor | Stage T | Stage N | Stage M | Stage (AJCC6) | Grade                     | Lauren Classification | <i>H. pylori</i> Status | <i>TP53</i> Mut  | <i>PIK3CA</i> Mut | <i>FAT4</i> Mut | <i>ARID1A</i> Mut | MSI status | Sequencing |
|----------|---------|-----|---------------|---------|---------|---------|---------------|---------------------------|-----------------------|-------------------------|------------------|-------------------|-----------------|-------------------|------------|------------|
| 87622942 | 56      | M   | CARDIA        | T4      | N3      | m0      | 4             | poorly differentiated     | diffuse               | no                      | WT               | Unknown           | WT              | WT                | MSS        | Sanger     |
| 82973565 | 69      | M   | body          | T3      | N1      | m0      | 3A            | poorly differentiated     | mixed                 | no                      | WT               | WT                | WT              | WT                | MSS        | Sanger     |
| 77263387 | 75      | M   | CARDIA        | T2b     | N1      | m0      | 2             | unknown                   | mixed                 | yes                     | N239T            | Unknown           | WT              | WT                | MSS        | Sanger     |
| 73291145 | 48      | F   | antrum        | T2b     | N1      | m0      | 2             | well differentiated       | intestinal            | yes                     | I195T            | WT                | WT              | WT                | MSS        | Sanger     |
| 66811693 | 68      | M   | lesser curve  | T1      | N1      | m0      | 1B            | moderately differentiated | intestinal            | no                      | R175H            | WT                | WT              | WT                | MSS        | Sanger     |
| 57701999 | 88      | M   | GE junction   | T3      | N1      | m0      | 3A            | moderately differentiated | intestinal            | no                      | c.719_721 insACA | Unknown           | WT              | WT                | MSS        | Sanger     |
| 57689477 | 84      | F   | greater curve | T1      | N0      | m0      | 1A            | moderately differentiated | intestinal            | no                      | R248Q            | WT                | WT              | WT                | MSS        | Sanger     |
| 38877042 | 65      | M   | lesser curve  | T3      | N1      | m0      | 3A            | poorly differentiated     | diffuse               | no                      | WT               | WT                | WT              | WT                | MSS        | Sanger     |
| 31661621 | 84      | F   | lesser curve  | T3      | N2      | m0      | 3B            | moderately differentiated | intestinal            | yes                     | c.456_457 insC   | Unknown           | WT              | WT                | MSS        | Sanger     |
| 21080055 | 54      | M   | lesser curve  | T2b     | N1      | m0      | 2             | poorly differentiated     | intestinal            | yes                     | WT               | WT                | WT              | WT                | MSS        | Sanger     |
| 20263644 | 64      | F   | lesser curve  | T2b     | N1      | m0      | 2             | poorly differentiated     | diffuse               | yes                     | WT               | Unknown           | WT              | WT                | MSS        | Sanger     |
| 20021007 | 53      | M   | GE junction   | T2b     | N0      | m0      | 1B            | poorly differentiated     | intestinal            | no                      | H179Y            | Unknown           | WT              | WT                | MSS        | Sanger     |
| 20020846 | 45      | M   | lesser curve  | T2b     | N1      | m0      | 2             | poorly differentiated     | diffuse               | yes                     | WT               | Unknown           | WT              | WT                | MSS        | Sanger     |
| 20020455 | 81      | F   | body          | T2b     | N1      | m1      | 4             | moderately differentiated | intestinal            | no                      | WT               | Unknown           | WT              | WT                | MSS        | Sanger     |
| 2001190  | 67      | F   | body          | T3      | N2      | m0      | 3B            | poorly differentiated     | diffuse               | no                      | WT               | Q546K             | WT              | WT                | MSS        | Sanger     |
| 2001123  | 56      | M   | CARDIA        | T3      | N2      | m0      | 3B            | moderately differentiated | intestinal            | no                      | WT               | Unknown           | WT              | WT                | MSS        | Sanger     |
| 2001086  | 79      | M   | antrum        | T3      | N1      | m0      | 3A            | poorly differentiated     | diffuse               | yes                     | WT               | Unknown           | WT              | WT                | MSS        | Sanger     |
| 2000892  | 71      | F   | lesser curve  | T2a     | N1      | m0      | 2             | moderately differentiated | intestinal            | no                      | WT               | Unknown           | G10S            | WT                | MSS        | Sanger     |
| 2000877  | 45      | M   | CARDIA        | T2a     | N1      | m0      | 2             | poorly differentiated     | intestinal            | no                      | R175H            | WT                | WT              | WT                | MSS        | Sanger     |
| 2000696  | 79      | F   | greater curve | T1      | N0      | m0      | 1A            | moderately differentiated | intestinal            | yes                     | WT               | WT                | WT              | WT                | MSS        | Sanger     |
| 2000676  | 84      | F   | antrum        | T3      | N1      | m0      | 3A            | moderately differentiated | intestinal            | yes                     | C242Y            | WT                | WT              | WT                | MSI        | Sanger     |
| 2000618  | 67      | M   | lesser curve  | T2a     | N1      | m0      | 2             | moderately differentiated | intestinal            | no                      | WT               | Unknown           | WT              | WT                | MSS        | Sanger     |
| 2000529  | 76      | M   | lesser curve  | T3      | N2      | m1      | 4             | moderately differentiated | intestinal            | yes                     | R213*            | Unknown           | A4485V          | WT                | MSS        | Sanger     |
| 2000521  | 66      | F   | greater curve | T3      | N3      | m0      | 4             | poorly differentiated     | diffuse               | no                      | WT               | WT                | WT              | WT                | MSS        | Sanger     |

| ID      | Age (Y) | Gen | Site of Tumor | Stage T | Stage N | Stage M | Stage (AJCC6) | Grade                     | Lauren Classification | H. pylori Status | TP53 Mut | PIK3CA Mut | FAT4 Mut | ARID1A Mut  | MSI status | Sequencing |
|---------|---------|-----|---------------|---------|---------|---------|---------------|---------------------------|-----------------------|------------------|----------|------------|----------|-------------|------------|------------|
| 2000479 | 62      | M   | PYLORUS       | T3      | N2      | m0      | 3B            | moderately differentiated | intestinal            | no               | WT       | WT         | WT       | WT          | MSS        | Sanger     |
| 2000472 | 81      | M   | PYLORUS       | T3      | N1      | m0      | 3A            | poorly differentiated     | diffuse               | no               | WT       | WT         | WT       | WT          | MSS        | Sanger     |
| 2000441 | 53      | M   | body          | T3      | N2      | m0      | 3B            | poorly differentiated     | diffuse               | no               | V173E    | Unknown    | WT       | c.4214 delT | MSS        | Sanger     |
| 2000433 | 56      | F   | PYLORUS       | T3      | N1      | m0      | 3A            | poorly differentiated     | diffuse               | yes              | F134C    | Unknown    | WT       | WT          | MSS        | Sanger     |
| 2000403 | 67      | M   | GE junction   | T2b     | N1      | m0      | 2             | poorly differentiated     | diffuse               | yes              | R213*    | WT         | WT       | WT          | MSS        | Sanger     |
| 2000286 | 65      | M   | body          | T3      | N0      | m0      | 2             | moderately differentiated | intestinal            | yes              | WT       | Unknown    | WT       | WT          | MSS        | Sanger     |
| 2000256 | 61      | F   | lesser curve  | T3      | N1      | m0      | 3A            | poorly differentiated     | mixed                 | no               | K132T    | WT         | WT       | WT          | MSS        | Sanger     |
| 2000242 | 67      | F   | lesser curve  | T1      | N0      | m0      | 1A            | moderately differentiated | intestinal            | yes              | WT       | Unknown    | WT       | WT          | MSS        | Sanger     |
| 2000238 | 74      | F   | greater curve | T3      | N0      | m0      | 2             | poorly differentiated     | diffuse               | no               | WT       | Unknown    | WT       | WT          | MSS        | Sanger     |
| 2000201 | 70      | M   | lesser curve  | T2b     | N0      | m0      | 1B            | well differentiated       | intestinal            | yes              | WT       | Unknown    | WT       | WT          | MSS        | Sanger     |
| 2000178 | 71      | F   | antrum        | T2a     | N1      | m0      | 2             | poorly differentiated     | intestinal            | yes              | WT       | WT         | WT       | WT          | MSS        | Sanger     |
| 2000175 | 64      | M   | antrum        | T3      | N1      | m1      | 4             | moderately differentiated | intestinal            | yes              | WT       | WT         | WT       | WT          | MSS        | Sanger     |
| 2000159 | 53      | F   | greater curve | T2b     | N0      | m0      | 1B            | moderately differentiated | intestinal            | yes              | WT       | Unknown    | WT       | WT          | MSS        | Sanger     |
| 2000114 | 53      | M   | lesser curve  | T3      | N3      | m0      | 4             | moderately differentiated | intestinal            | yes              | WT       | WT         | WT       | WT          | MSS        | Sanger     |
| 2000088 | 53      | M   | PYLORUS       | T3      | N1      | m1      | 4             | poorly differentiated     | diffuse               | no               | R248Q    | Unknown    | WT       | WT          | MSS        | Sanger     |
| 2000085 | 53      | M   | lesser curve  | T2a     | N0      | m0      | 2             | moderately differentiated | intestinal            | yes              | WT       | Unknown    | WT       | WT          | MSS        | Sanger     |
| 2000068 | 65      | F   | greater curve | T1      | N0      | m0      | 1A            | moderately differentiated | intestinal            | yes              | R196*    | WT         | L1900V   | WT          | MSS        | Sanger     |
| 2000040 | 70      | M   | body          | T4      | N3      | m0      | 4             | poorly differentiated     | diffuse               | no               | R158H    | WT         | WT       | WT          | MSS        | Sanger     |

**Supplementary Table 10**

**Association of clinicopathologic variables with *FAT4* and *ARID1A* mutation status**

|                                 | <b>FAT4</b> |         | <b>P value</b>  | <b>ARID1A</b> |         | <b>P value</b> |
|---------------------------------|-------------|---------|-----------------|---------------|---------|----------------|
|                                 | Mut(6)      | WT(104) |                 | Mut(9)        | WT(101) |                |
| <b>Age<sup>1</sup></b>          |             |         | 0.204           |               |         | 0.703          |
| Mean                            | 69.5        | 63.6    |                 | 63.1          | 64.0    |                |
| S.D                             | 6.3         | 12.9    |                 | 9.5           | 13.0    |                |
| <b>Gender</b>                   |             |         | 0.677           |               |         | 0.478          |
| Male                            | 3           | 64      |                 | 7             | 60      |                |
| Female                          | 3           | 40      |                 | 2             | 41      |                |
| <b>StageT<sup>2</sup></b>       |             |         | 0.380           |               |         | 0.687          |
| T1                              | 2           | 7       |                 | 0             | 9       |                |
| T2                              | 1           | 25      |                 | 3             | 23      |                |
| T3                              | 3           | 63      |                 | 5             | 61      |                |
| T4                              | 0           | 9       |                 | 1             | 8       |                |
| <b>StageN<sup>3</sup></b>       |             |         | 1               |               |         | 0.462          |
| N0                              | 2           | 18      |                 | 1             | 19      |                |
| N1                              | 2           | 53      |                 | 4             | 51      |                |
| N2                              | 1           | 20      |                 | 4             | 17      |                |
| N3                              | 1           | 13      |                 | 0             | 14      |                |
| <b>StageM</b>                   |             |         | 0.477           |               |         | 0.594          |
| M0                              | 5           | 94      |                 | 9             | 90      |                |
| M1                              | 1           | 10      |                 | 0             | 11      |                |
| <b>Stage(AJCC6)<sup>4</sup></b> |             |         | 0.402           |               |         | 1              |
| Stage1                          | 2           | 13      |                 | 1             | 14      |                |
| Stage2                          | 1           | 21      |                 | 2             | 20      |                |
| Stage3                          | 1           | 44      |                 | 5             | 40      |                |
| Stage4                          | 2           | 26      |                 | 1             | 27      |                |
| <b>Grade<sup>5</sup></b>        |             |         | <b>6.06E-03</b> |               |         | 1              |
| Undifferentiated                | 0           | 1       |                 | 1             | 0       |                |
| Poorly differentiated           | 0           | 60      |                 | 4             | 56      |                |
| Moderately differentiated       | 6           | 39      |                 | 4             | 41      |                |
| Well differentiated             | 0           | 3       |                 | 0             | 3       |                |
| Unknown                         | 0           | 1       |                 | 0             | 1       |                |

|               | FAT4   |         | P value | ARID1A |         | P value         |
|---------------|--------|---------|---------|--------|---------|-----------------|
|               | Mut(6) | WT(104) |         | Mut(9) | WT(101) |                 |
| <b>Lauren</b> |        |         | 0.148   |        |         | 0.505           |
| Diffuse       | 0      | 37      |         | 2      | 35      |                 |
| Intestinal    | 6      | 60      |         | 6      | 60      |                 |
| Mixed         | 0      | 7       |         | 1      | 6       |                 |
| <b>HP</b>     |        |         | 1       |        |         | 0.296           |
| Yes           | 3      | 44      |         | 2      | 45      |                 |
| No            | 3      | 60      |         | 7      | 56      |                 |
| <b>TP53</b>   |        |         | 0.200   |        |         | 0.149           |
| TP53 WT       | 2      | 66      |         | 8      | 60      |                 |
| TP53 Mutant   | 4      | 38      |         | 1      | 41      |                 |
| <b>PIK3CA</b> |        |         | 1       |        |         | <b>1.31E-03</b> |
| PIK3CA WT     | 3      | 40      |         | 1      | 42      |                 |
| PIK3CA Mutant | 0      | 8       |         | 4      | 4       |                 |
| Unknown       | 3      | 56      |         | 4      | 55      |                 |
| <b>MSI</b>    |        |         | 0.332   |        |         | <b>6.80E-04</b> |
| MSI           | 1      | 6       |         | 4      | 3       |                 |
| MSS           | 5      | 98      |         | 5      | 98      |                 |

Remarks:

1. Associations with age were tested by two-sided Wilcoxon Sum Rank Test, the rest were tested using a two-sided Fisher Exact Test
2. Stage T associations were examined by combining T1&T2 versus T3&T4
3. Stage N association were examined by combining N0&N1 versus N2&N3
4. Stage (AJCC6) associations were examined by combining Early Stage(Stage1&Stage2) versus Late Stage(Stage3&Stage4)
5. Grade associations were tested among the two groups: Undifferentiated or poorly differentiated versus Moderately to well differentiated



### Supplementary Table 11

#### Summary of *FAT4* somatic mutations in gastric adenocarcinomas and associated clinicopathologic information.

Data represent somatic mutations found in both the discovery set and prevalence set. We observed 7 non-synonymous and 0 synonymous mutations, whereas the expected values are 5.28 and 1.72, with a trend toward an excess of non-synonymous mutations at  $p = 0.19$ . When compared against the background mutation rate, *FAT4* harbors a greater than expected number of non-synonymous mutations ( $p = 0.0016$ ,  $FDR = 0.32$ , **Supplementary Table 7**).

| ID      | <i>FAT4</i>      | Age (y) | Gen    | Site of Tumor | Stage T | Stage N | Stage M | Stage (AJCC6) | Grade                     | Lauren     | <i>H. pylori</i> Status | LOH |
|---------|------------------|---------|--------|---------------|---------|---------|---------|---------------|---------------------------|------------|-------------------------|-----|
| 2000529 | A4485V           | 76      | male   | lesser curve  | T3      | N2      | m1      | 4             | moderately differentiated | intestinal | yes                     | yes |
| 990111  | C4479F           | 74      | female | lesser curve  | T1      | N0      | m0      | 1A            | moderately differentiated | intestinal | no                      | no  |
| 2000892 | G10S             | 71      | female | lesser curve  | T2a     | N1      | m0      | 2             | moderately differentiated | intestinal | no                      | no  |
| 970010  | L1062R           | 72      | male   | unknown       | T3      | N1      | m0      | 3A            | moderately differentiated | intestinal | yes                     | yes |
| 2000068 | L1900V           | 65      | female | greater curve | T1      | N0      | m0      | 1A            | moderately differentiated | intestinal | yes                     | yes |
| 990515  | P4454L<br>Q4872H | 59      | male   | lesser curve  | T3      | N3      | m0      | 4             | moderately differentiated | intestinal | no                      | yes |

## Supplementary Table 12

### Summary of *ARID1A* somatic mutations in gastric adenocarcinomas and associated clinicopathologic information.

Data represent somatic mutations found in both the discovery set and prevalence set. WT means no somatic mutation was found. We observed 3 non-synonymous and 0 synonymous mutations, whereas the expected values are 1.85 and 1.15, with a trend toward an excess of non-synonymous mutations at  $p = 0.0555$ . Note that this analysis does not consider indels. The analogous analysis of *FAT4* and *ARID1A* combined yields a  $p$  value of 0.038. When compared against the background mutation rate, *ARID1A* harbored an excess of non-silent mutations ( $p = 4.14 \times 10^{-5}$ , FDR = 0.069, **Supplementary Table 7**).

| ID      | <i>ARID1A</i>             | <i>TP53</i> | <i>PIK3CA</i> | Age (y) | Gen | Site of Tumor | Stage T | Stage N | Stage M | Stage (AJCC6) | Grade                     | Lauren     | <i>H. pylori</i> | MSI status |
|---------|---------------------------|-------------|---------------|---------|-----|---------------|---------|---------|---------|---------------|---------------------------|------------|------------------|------------|
| 990024  | c.1650delC;<br>c.3978InsC | WT          | R88Q          | 68      | M   | lesser curve  | T3      | N1      | m0      | 3A            | moderately differentiated | intestinal | yes              | MSI        |
| 980028  | c.3999_4001 delGCA        | WT          | Unknown       | 61      | M   | unknown       | T2a     | N0      | m0      | 1B            | moderately differentiated | intestinal | no               | MSI        |
| 990205  | c.400delG;<br>c.3216delA  | WT          | Unknown       | 72      | Fe  | lesser curve  | T2b     | N1      | m0      | 2             | poorly differentiated     | intestinal | no               | MSI        |
| 2000441 | c.4214delT                | V173E       | Unknown       | 53      | M   | body          | T3      | N2      | m0      | 3B            | poorly differentiated     | diffuse    | no               | MSS        |
| 980161  | c.5547insG                | WT          | E545K         | 66      | Fe  | lesser curve  | T4      | N1      | m0      | 4             | moderately differentiated | intestinal | no               | MSS        |
| 990097  | c.6748insA                | WT          | E545K         | 46      | M   | cardia        | T3      | N2      | m0      | 3B            | poorly differentiated     | intestinal | no               | MSS        |
| 980097  | Q812*                     | WT          | Unknown       | 65      | M   | unknown       | T2a     | N1      | m0      | 2             | undifferentiated          | mixed      | no               | MSS        |
| 990005  | R1276*                    | WT          | WT            | 60      | M   | greater curve | T3      | N2      | m0      | 3B            | poorly differentiated     | diffuse    | no               | MSS        |
| TGH     | R1721*                    | WT          | R93Q          | 77      | M   | unknown       | T3      | N2      | M0      | 3B            | moderately differentiated | intestinal | yes              | MSI        |

### Supplementary Table 13

**ARID1A protein expression status in ARID1A-mutated and wild-type samples.** The table lists 9 *ARID1A*-mutated samples and 12 *ARID1A* wild-type samples. *ARID1A* genetic status was determined either by exome or Sanger sequencing. Representative IHC images are presented in **Supplementary Figure 8**.

| Tumor ID | <i>ARID1A</i> Genetic Status | Sequencing Platform | <i>ARID1A</i> Protein Expression (IHC) |
|----------|------------------------------|---------------------|----------------------------------------|
| 990097   | <i>ARID1A</i> mutated        | Exome Sequenced     | Negative                               |
| 990005   | <i>ARID1A</i> mutated        | Exome Sequenced     | Negative                               |
| TGH      | <i>ARID1A</i> mutated        | Exome Sequenced     | Weak                                   |
| 990024   | <i>ARID1A</i> mutated        | Sanger              | Weak                                   |
| 980161   | <i>ARID1A</i> mutated        | Sanger              | Weak                                   |
| 980097   | <i>ARID1A</i> mutated        | Sanger              | Negative                               |
| 2000441  | <i>ARID1A</i> mutated        | Sanger              | Positive                               |
| 980028   | <i>ARID1A</i> mutated        | Sanger              | Positive                               |
| 990205   | <i>ARID1A</i> mutated        | Sanger              | ND                                     |
|          |                              |                     |                                        |
| 2000362  | <i>ARID1A</i> Wild type      | Exome Sequenced     | Positive                               |
| 970010   | <i>ARID1A</i> Wild type      | Exome Sequenced     | ND                                     |
| 98748381 | <i>ARID1A</i> Wild type      | Exome Sequenced     | Positive                               |
| 990515   | <i>ARID1A</i> Wild type      | Exome Sequenced     | Positive                               |
| 990172   | <i>ARID1A</i> Wild type      | Exome Sequenced     | Positive                               |
| 990475   | <i>ARID1A</i> Wild type      | Exome Sequenced     | Positive                               |
| 76629543 | <i>ARID1A</i> Wild type      | Exome Sequenced     | Positive                               |
| 990089   | <i>ARID1A</i> Wild type      | Exome Sequenced     | Positive                               |
| 990300   | <i>ARID1A</i> Wild type      | Exome Sequenced     | Positive                               |
| 31231321 | <i>ARID1A</i> Wild type      | Exome Sequenced     | Positive                               |
| 990396   | <i>ARID1A</i> Wild type      | Exome Sequenced     | Positive                               |
| TWH      | <i>ARID1A</i> Wild type      | Exome Sequenced     | Positive                               |

ND=not done due to IHC technical difficulties

### Supplementary Table 14

**Sequencing analysis of *ARID1A* cDNA clones.** GC990024, a tumor harboring two *ARID1A* inactivating mutations (1650delC and 3978insC) was subjected to RT-PCR using *ARID1A*-specific primers flanking both mutations. Amplified RT-PCR products were cloned into PCR4-Topo vectors, followed by Sanger sequencing of individual *ARID1A* cDNA clones. Sanger sequencing was performed on individual *ARID1A* cDNA clones. The table lists the sequencing results for 27 individual clones. WT-WT: Wild-type at both mutation sites; 1650delC-WT: Presence of 1650delC mutation but no 3978insC mutation; WT-3978insC : Presence of 3978insC mutation but no 1650delC mutation; 1650delC-3978insC : Presence of both mutations. Eight clones contained the 1650delC mutation but were negative for the 3978insC mutation. 10 clones contained the 3978insC mutation but not the 1650 delC mutation. No clones contained both mutations. 9 clones were wild type, likely reflecting contributions from normal cells. This result strongly suggests that the *ARID1A* mutations are likely to affect both *ARID1A* alleles.

| Genotype          | Number of clones | %    |
|-------------------|------------------|------|
| WT-WT             | 9                | 33.3 |
| 1650delC-WT       | 8                | 29.6 |
| WT-3978insC       | 10               | 37   |
| 1650delC-3978insC | 0                | 0    |
| Total             | 27               | 100  |

**Supplementary Table 15**

**Primer sequences used for prevalence screening of *FAT4* (whole coding region), *PIK3CA* (exon 1, 9 and 20) and *TP53* (exon 4, 5, 6, 7, 8 and 9).**

| <b>Gene/Exon</b> | <b>Forward Primer</b>     | <b>Reverse Primer</b>      |
|------------------|---------------------------|----------------------------|
| FAT4Exon1_1      | gtctcagaccaagccgtcag      | tgcaggcgatagcggatgctc      |
| FAT4Exon1_2      | ccagctcctgggtgaggtggag    | tctgggaagcaagttcacggctcc   |
| FAT4Exon1_3      | gtgtacagagtgaacctgagcga   | taccacatgatatcccagcgcca    |
| FAT4Exon1_4      | caggcaatgctcagagtgg       | ctgtcttgaagttcacgggtcca    |
| FAT4Exon1_5      | tgaagtcacccttctgagtc      | ggacacgagttcaccaattctc     |
| FAT4Exon1_6      | agacagtacctctggcaggtta    | tgaaggtgtctgtgtccca        |
| FAT4Exon1_7      | cggtatgcttgaagaacgtg      | ctctgttagcctttgacagaaca    |
| FAT4Exon2        | tggcagtcttgattgcgtgat     | gaaaggagcacacatgcttaacct   |
| FAT4Exon3        | catacaaagctttaccgccttcg   | aactgccgttggtcacacagcta    |
| FAT4Exon4        | ctgaggtccactggatatctga    | ttgtgacagctcaacacaata      |
| FAT4Exon5_1      | tcctaaagtgtggttgatgcacg   | atgccatagcgaacctgtcca      |
| FAT4Exon5_2      | ttgggaccattgatggtaagtg    | ggaagcgtaaacgctgtagaa      |
| FAT4Exon6        | tgaagccttcaaaaatgctgtgc   | aagtgtctggggttacaggcatgag  |
| FAT4Exon7        | aggatcccctgccttgactgg     | aagcaccagtgtagtcccaaac     |
| FAT4Exon8        | tgttgggtggccttgcaaaa      | ccatcagacaaaaaacctg        |
| FAT4Exon9_1      | aaggtcacatcaagcagcaa      | tatctgagaaaacctaggggca     |
| FAT4Exon9_2      | ctgttcggcaatggacaaggac    | ggttcaagtcagaaatcagggagg   |
| FAT4Exon9_3      | tggacagtaatgacaatgcacctc  | gtttgaaaacaaaacggggcac     |
| FAT4Exon9_4      | ctgtacagtcatctgacagtgacc  | aactggtggcaggacctgtg       |
| FAT4Exon9_5      | ccctcagctacaggtagtgc      | cttcgtagacagctccctcca      |
| FAT4Exon9_6      | cttagggactgctgtgcaactg    | aagtgcttagaacagtatttgacc   |
| FAT4Exon10       | tggtaatggtgtaacgggtgtt    | ccaatgcaatgtattcaatggg     |
| FAT4Exon11       | ggtgtctttgaaaactgc        | agtatagtctgacatggcct       |
| FAT4Exon12       | agtcattggtagtgttgctg      | accagtcattgaaactgcc        |
| FAT4Exon13       | tcggaagtctaacaactctg      | catatctctgtgctggaa         |
| FAT4Exon14       | acttccatgcttagaacagtgc    | tttgattacatactgggtgca      |
| FAT4Exon15       | ggacattaattccaaaacgacat   | gtgccagcattagtcggaac       |
| FAT4Exon16       | tctatctgctgtggactggtc     | agctctcgagaaagtgtggcta     |
| FAT4Exon17_1     | gaggtgattgtggagcttctc     | ttcaggtgcttctcagctc        |
| FAT4Exon17_2     | agaacgttgctttgatgacctc    | aatcggtgctttaggcgactc      |
| FAT4Exon17_3     | agtcctcaggccatggcatcac    | aatgtgacccaacctagtgcagc    |
|                  |                           |                            |
| TP53 Exon4       | cctggctctgactgctct        | gccaggcattgaagtctcat       |
| TP53 Exon5-Exon6 | ctagctcgctagtgggtg        | aggagaaagccccctactg        |
| TP53 Exon7       | tgcttggcacaggtctcc        | aagctccagctccaggtagg       |
| TP53 Exon8-Exon9 | ttccttactgcctcttgctt      | gaaaacggcattttgagtg        |
|                  |                           |                            |
| PIK3CA Exon1     | cttctgtagttgtctcttttaacat | agaaaagctatttaagattacgaagg |
| PIK3CA Exon9     | tgaaaatgtattgctttttctgt   | tgtaaatctgctttatttcc       |
| PIK3CA Exon20    | catttgctccaaactgacca      | atgctgttaattgtgtggaag      |

### Supplementary Table 16

Primer sequences used for *ARID1A*, *E2F1*, *Cyclin E1* and *GAPDH* real-time PCR and *ARID1A* cDNA sequencing

| Gene and application           | Forward                 | Reverse                |
|--------------------------------|-------------------------|------------------------|
| ARID1A real-time RCP primer    | AAGCCACCAACTCCAGCATCCA  | CGCTTCTGGAATGTGGAGTCAC |
| E2F1 real-time PCR primer      | GGACCTGGAAACTGACCATCAG  | CAGTGAGGTCTCATAGCGTGAC |
| Cyclin E1 real-time PCR primer | GGTTAATGGAGGTGTGTGAAGTC | CCATCTGTCACATACGCAAAC  |
| GAPDH real-time PCR primer     | GAGTCAACGGATTTGGTC      | GACAAGCTTCCCGTTCTCAG   |
| ARID1A cDNA sequencing primer  | AGCCTCCACATCAGCAGTC     | ATTGCCATAGGAATCATGTTCG |

## Supplementary Note

### Gastric cancer tissues and cell lines

Primary gastric and matched normal tissues were obtained from the Singhealth Tissue Repository or National University Hospital Singapore Tissue Repository, after approvals from Institutional Research Ethics Review Committees, and with signed patient informed consent. Gastric cancer cell lines were obtained from the American Type Culture Collection (Manassas, VA) or from collaborating institutions. Cell lines were grown at 37°C in a humidified atmosphere of 5% CO<sub>2</sub>. The cells were subcultured when they reached 90% confluence using a trypsin/EDTA solution (0.05% trypsin, 0.5 mM EDTA).

### DNA and RNA extraction

Genomic DNA was extracted from frozen tissues and cell lines using a Qiagen genomic DNA extraction kit. For real-time PCR, total RNA was extracted using a TriPure kit (Roche, IN). For expression microarrays, total RNA was extracted using a Qiagen Rneasy Kit.

### Cell line transfections

*FAT4* and *ARIDIA* siRNAs (pooled or individual) or control siRNAs (Dharmacon, IL) were transfected into gastric cancer cell lines using Lipofectamine (Invitrogen, CA) according to the manufacturer's conditions. Cell lines stably expressing either *ARIDIA* short hairpin RNAs (shRNA) or scrambled control shRNAs were established by a Block-iT Letiviral Pol II miR RNAi system (Invitrogen, CA) and selected by puromycin (2.5 ug/ml) (Sigma-Aldrich, MO) to generate stable, pooled populations. *ARIDIA*-expressing vectors or empty vector controls were transfected into gastric cancer cells using Effectene Transfection Reagent (Qiagen Inc., CA).

### Cell proliferation, invasion and migration assays

Cells were seeded into 96-well plates ( $2 \times 10^3$  cells per well) 24 hours prior to transfection with recombinant DNA constructs or siRNAs. Growth of untransfected or 24, 48, 72 and 96 hours post-transfected cells were determined by a colorimetric 3-(4,5-dimethylthiazol-2-yl)-5-(3-carboxymethoxyphenyl)-(4-sulfophenyl)-2H-tetrazolium assay according to the manufacturer's instruction (MTS; Promega, WI). Optical densities were measured using a PerkinElmer plate reader. Experiments were performed in triplicate, and the results were averaged over three independent experiments. Results are shown as the mean  $\pm$  SEM of three independent experiments and were analyzed by student's T test using PRISM software (GraphPad Software Inc., CA). Means were considered significantly different from each other at  $P < 0.05$ . For cellular invasion and migration assays, Gastric cancer cells were treated with 50 nM *FAT4* siRNA (Si-*FAT4*) or 50 nM control siRNA (Si-Ctrl) for 24 h prior to seeding into transwells. Seeded cells were observed for an additional 12 h to assess migration rates. For invasion assays, transfected cells were seeded into Matrigel-coated transwells and cultured for 48 h. After this time period, non-migrating/invading cells were wiped from the upper side of the filter and nuclei of migrating/invading cells were stained with DAPI and counted. Results are expressed as mean  $\pm$  SEM of at least three independent experiments. \* $p < 0.05$  compared with respective controls (i.e. Si-Ctrl) using Student's t-test.

### Colony formation assays

For soft-agar colony formation assays, cells were treated with *FAT4* or control siRNAs for 48 hours. The treated cells (6000 cells for MKN74 and 5000 cells for YCC16) were plated in 0.3% agar in medium and layered over 0.5% agar covered in six-well plates in triplicate. Cells were allowed to grow for 21 days to form colonies, which were then stained with Thiazolyl Blue Tetrazolium Bromide (2 mg/ml; Sigma). Images were taken using the Kodak GL 200 System (EpiWhite illumination).

### Adhesion assays

Adhesion assays were performed using the InnoCyte™ ECM adhesion assay kit (Calbiochem) and performed according to the manufacturer's instructions. Briefly, 10,000 cells (HGC27, YCC16 or MKN74 cells) were transfected *FAT4* siRNAs (Si-FAT4) or control siRNA in serum free medium, added to fibronectin-coated 96 well plates, and allowed to adhere at 37 C for 1.5 h. After incubation, the plates were washed twice with cold PBS, and adherent cells were stained with Calcein-AM green fluorescent dye and incubated for one additional hour at 37 C in a cell culture incubator. Fluorescence was measured using a fluorescence plate reader at excitation wavelength 485 nm and emission wavelength 520 nm. Results are expressed as fold change versus Si-Ctrl.

### Immunohistochemistry (IHC)

ARID1A IHC was performed using ARID1A antibodies (Sigma, HPA005456, 1:50). Tumor sections were treated with citrate buffer (pH 6.0) and pressure cooking (3 min) for antigen retrieval. Primary antibody incubations were 1 hour at room temperature. Manual DAKO Envision kits were used for visualization. Normal epithelial and lymphoid cell nuclei were used as positive internal controls. Loss or decreased nuclear staining in tumor cells relative to normal cells was interpreted as ARID1A protein loss.

### Real-time RT-PCR and cDNA Sequencing

Total purified RNA was reverse-transcribed to cDNA using iScript™ cDNA Synthesis Kit (Bio-Rad, CA) following the manufacturer's instructions. Real-time PCR was performed with SsoFast EvaGreen Supermix according to the manufacturer's recommendations using a CFX96™ Real-Time PCR Detection System (Bio-Rad, CA) and the primers for *ARID1A*, *E2F1*, *CyclinE1*, and *GAPDH* (**Supplementary Tables 16**). All RT-qPCR experiments were run in triplicate, and a mean value was used for the determination of mRNA levels. Negative controls containing water instead of sample cDNAs were used in each experiment. Relative quantification of the mRNA levels of *ARID1A*, *E2F1*, *cyclinE1* was performed using the comparative Cq method with *GAPDH* as the reference gene and with the formula  $2^{-\Delta\Delta Cq}$ .

To sequence *ARID1A*-mutated cDNAs of tumor 990024, total RNA was extracted from *ARID1A*-mutated tumor (990024) and subjected to *ARID1A* RT-PCR using primers designed to flank mutation sites (**Supplementary Tables 16**). Amplified RT-PCR products were cloned into PCR4-Topo vectors (Invitrogen CA). Individual cDNA clones were isolated and processed for Sanger sequencing.



### **Western blot analysis**

Cellular proteins were extracted with lysis buffer (20 mM Tris-HCl pH 7.5, 150 mM NaCl, 1 mM Na<sub>2</sub>EDTA, 1 mM EGTA, 1% Triton, 2.5 mM sodium pyrophosphate, 1 mM  $\beta$ -glycerophosphate, 1 mM Na<sub>3</sub>VO<sub>4</sub> and 1  $\mu$ g/mL leupeptin) containing freshly added protease inhibitor cocktail (Sigma-Aldrich). Cell lysates were sonicated, centrifuged for 30 min at 20,000 *g* and supernatants were collected and stored at -70°C. Protein concentrations were quantified using the DC assay (Bio-Rad Laboratories, Mississauga, ON) with bovine serum albumin as a standard. Western blotting was performed on supernatants using the following antibodies, FAT4 (P-17) and ARID1A (sc-32761) (Santa Cruz, CA);  $\beta$ -actin (A-1978) (Sigma-Aldrich, MO); tubulin antibody (Cell Signaling Technology, MA). All antibodies were diluted in TBS with 5% (w/v) skim milk and 0.1% (v/v) Tween-20. Equal amounts of protein were subjected to reducing SDS polyacrylamide gel electrophoresis prior to being electrotransferred to nitrocellulose membrane (Bio-Rad Laboratories). Membranes were blocked for 1 h at room temperature in TBS with 5% skim milk and 0.1% Tween-20, and incubated with primary antibodies overnight at 4°C. After four washes with TBS containing 0.1% Tween-20, the membranes were incubated with secondary antibodies conjugated with horseradish peroxidase, washed four times and visualized with SuperSignal West Pico chemiluminescent substrate (Pierce, IL) and Kodak BioMax XAR film (VWR International).

### **Microsatellite instability (MSI) testing**

Gastric cancer tissues were evaluated for MSI status by microsatellite sequencing. Tumor genomic DNAs were processed using the Promega MSI Analysis System Version 1.2 (Promega Corp, USA) measuring five mononucleotide markers (NR-21, BAT-26, BAT-25, NR-24, MONO-27) and two pentanucleotide markers (Penta C and Penta D) for sample identification. MSI analysis was performed according to the manufacturer's protocol and PCR products were analyzed using an ABI 3130XL Genetic Analyzer (Applied Biosystems, USA). Tumors exhibiting shifts in two or more microsatellites were designated as MSI-high (MSI-H), and tumors with less than two or no shifts were microsatellite stable (MSS). This method is technically better than the original NCI-reported panel for MSI assessment<sup>1,2</sup>.

## Supplementary references

1. Murphy KM, et al. Comparison of the microsatellite instability analysis system and the Bethesda panel for the determination of microsatellite instability in colorectal cancers. *J Mol Diagn.* **8**, 305-311 (2006)
2. Salto-Tellez M, et al. Microsatellite instability in colorectal cancer: considerations for molecular diagnosis and high-throughput screening of archival tissues. *Clin Chem.* **50**, 1082-1086 (2004)
